# Supplementary material for: Cost–effectiveness analysis of revised WHO guidelines for management of childhood pneumonia in 74 Countdown countries
Source: PubMed Central journal article supplement (PMC5344007; doi:10.7189/jogh.07.010409), 2017-06
Supplement: jogh-07-010409-s001.pdf [file jogh-07-010409-s001.pdf]

## Online Supplementary Document

Zhang et al. Cost-effectiveness analysis of revised WHO guidelines for management of childhood pneumonia in 74 Countdown countries

J Glob Health 2017;7:010409

Supplementary material for  
“Cost-effectiveness analysis of 2013 WHO  
guidelines for management of childhood  
pneumonia in 74 countdown countries”

---

|                                                                                                                                                                                                                       |    |
|-----------------------------------------------------------------------------------------------------------------------------------------------------------------------------------------------------------------------|----|
| Supplementary 1 table: Total cost savings at national level by HIV prevalence and CCM implementation status .....                                                                                                     | 3  |
| Supplementary 2 table: Total cost of pneumonia treatment in a high cost scenario .....                                                                                                                                | 5  |
| Supplementary 3 table: Total cost of pneumonia treatment at national level by HIV status in a high cost scenario .....                                                                                                | 6  |
| Supplementary 4 table: Total DALYs averted and cost-effectiveness of implementing 2013 guidelines in a high cost scenario .....                                                                                       | 9  |
| Supplementary 5 table: Total cost of pneumonia treatment in a low cost scenario .....                                                                                                                                 | 11 |
| Supplementary 6 table: Total cost of pneumonia treatment by HIV status in a low cost scenario .....                                                                                                                   | 12 |
| Supplementary 7 table: Total DALYs averted and cost-effectiveness of implementing 2013 guidelines in a low cost scenario.....                                                                                         | 15 |
| Supplementary 8 table: Total cost of pneumonia treatment in 2013 using effective access to care scenario .....                                                                                                        | 17 |
| Supplementary 9 table: Total cost of pneumonia treatment by HIV status using effective access to care scenario .....                                                                                                  | 18 |
| Supplementary 10 table: Total DALYs averted and cost-effectiveness of implementing 2013 guidelines using effective access to care scenario.....                                                                       | 21 |
| Supplementary 11 table: Total cost of pneumonia treatment in 2013 using unpublished data on proportion of clinical signs in children with pneumonia in a high HIV burden setting.....                                 | 23 |
| Supplementary 12 table: Total cost of pneumonia treatment by HIV status using unpublished data on proportion of clinical signs in children with pneumonia in high HIV burden settings....                             | 24 |
| Supplementary 13 table: Total DALYs averted and cost-effectiveness of implementing 2013 guidelines using unpublished data on proportion of clinical signs in children with pneumonia in high HIV burden settings..... | 27 |
| Supplementary 14 table: Total cost of pneumonia treatment in a high cost less effective scenario .....                                                                                                                | 29 |
| Supplementary 15 table: Total cost of pneumonia treatment at national level by HIV status in a high cost less effective scenario .....                                                                                | 30 |
| Supplementary 16 table: Total DALYs averted and cost-effectiveness of implementing 2013 guidelines in a high cost less effective scenario.....                                                                        | 33 |
| Supplementary 17 table: Total DALYs averted and cost-effectiveness of implementing 2013 guidelines in a less effective scenario .....                                                                                 | 35 |
| Supplementary 18 table: Total DALYs averted and cost-effectiveness of implementing 2013 guidelines in not cost-effective scenario.....                                                                                | 37 |
| Supplementary 19 table: Years of Life Saved and deaths averted in each country by implementing 2013 guidelines .....                                                                                                  | 39 |

Supplementary 1 table: Total cost savings at national level by HIV prevalence and CCM implementation status

| HIV Prevalence             | CCM implementation | Country                             | Total Cost Savings = 2013 Guidelines - 2005 Guidelines (Thousands, US\$ 2013) |              |             |           |           |
|----------------------------|--------------------|-------------------------------------|-------------------------------------------------------------------------------|--------------|-------------|-----------|-----------|
|                            |                    |                                     | HIV+                                                                          | HIV-         | Total       |           |           |
| Low HIV Prevalence         | Yes                | Afghanistan                         | 0.18                                                                          | -7,545.94    | -7,545.77   |           |           |
|                            |                    | Azerbaijan                          | 14.00                                                                         | -4,749.49    | -4,735.49   |           |           |
|                            |                    | Bangladesh                          | 0.27                                                                          | -21,719.94   | -21,719.66  |           |           |
|                            |                    | China                               | 32.55                                                                         | -199,454.33  | -199,421.77 |           |           |
|                            |                    | Eritrea                             | 4.39                                                                          | -1,587.07    | -1,582.68   |           |           |
|                            |                    | Guatemala                           | 0.81                                                                          | -1,473.90    | -1,473.09   |           |           |
|                            |                    | India                               | 523.54                                                                        | -470,813.10  | -470,289.56 |           |           |
|                            |                    | Indonesia                           | 23.96                                                                         | -28,014.19   | -27,990.23  |           |           |
|                            |                    | Korea, Democratic People's Republic | 0.07                                                                          | -3,873.31    | -3,873.24   |           |           |
|                            |                    | Kyrgyzstan                          | 0.06                                                                          | -881.16      | -881.09     |           |           |
|                            |                    | Lao People's Democratic Republic    | 1.56                                                                          | -1,519.98    | -1,518.42   |           |           |
|                            |                    | Madagascar                          | 2.24                                                                          | -3,441.29    | -3,439.05   |           |           |
|                            |                    | Mexico                              | 19.81                                                                         | -61,334.08   | -61,314.27  |           |           |
|                            |                    | Myanmar                             | 9.03                                                                          | -5,822.95    | -5,813.92   |           |           |
|                            |                    | Nepal                               | 0.99                                                                          | -2,368.22    | -2,367.23   |           |           |
|                            |                    | Niger                               | 1.78                                                                          | -3,419.43    | -3,417.64   |           |           |
|                            |                    | Pakistan                            | 2.98                                                                          | -34,518.97   | -34,516.00  |           |           |
|                            |                    | Papua New Guinea                    | 4.47                                                                          | -1,542.58    | -1,538.11   |           |           |
|                            |                    | Peru                                | 7.75                                                                          | -7,412.32    | -7,404.57   |           |           |
|                            |                    | Philippines                         | 0.92                                                                          | -27,310.63   | -27,309.71  |           |           |
|                            |                    | Senegal                             | 5.08                                                                          | -2,365.19    | -2,360.11   |           |           |
|                            |                    | Somalia                             | 0.08                                                                          | -2,087.11    | -2,087.03   |           |           |
|                            |                    | Tajikistan                          | 0.56                                                                          | -1,263.21    | -1,262.65   |           |           |
|                            |                    | Turkmenistan                        | 1.50                                                                          | -2,314.97    | -2,313.48   |           |           |
| Uzbekistan                 | 5.27               | -4,994.20                           | -4,988.92                                                                     |              |             |           |           |
| Yemen                      | 2.66               | -8,927.94                           | -8,925.28                                                                     |              |             |           |           |
| Total                      |                    | 666.52                              | -910,755.50                                                                   | -910,088.98  |             |           |           |
|                            | No                 | Bolivia (Plurinational State of)    | 1.04                                                                          | -1,370.51    | -1,369.47   |           |           |
|                            |                    | Brazil                              | 4.36                                                                          | -21,311.35   | -21,306.99  |           |           |
|                            |                    | Cambodia                            | 2.73                                                                          | -1,343.13    | -1,340.40   |           |           |
|                            |                    | Comoros                             | 0.01                                                                          | -174.55      | -174.54     |           |           |
|                            |                    | Egypt                               | 0.30                                                                          | -10,726.93   | -10,726.63  |           |           |
|                            |                    | Iraq                                | 77.51                                                                         | -16,318.11   | -16,240.60  |           |           |
|                            |                    | Morocco                             | 1.29                                                                          | -5,309.51    | -5,308.22   |           |           |
|                            |                    | Solomon Islands                     | 0.12                                                                          | -101.91      | -101.79     |           |           |
|                            |                    | Viet Nam                            | 11.98                                                                         | -11,371.87   | -11,359.88  |           |           |
|                            |                    | Total                               | 99.34                                                                         | -68,027.86   | -67,928.52  |           |           |
|                            |                    | High HIV Prevalence                 | Yes                                                                           | Benin        | 4.50        | -1,602.96 | -1,598.46 |
|                            |                    |                                     |                                                                               | Burkina Faso | 8.07        | -4,504.05 | -4,495.98 |
|                            |                    |                                     |                                                                               | Burundi      | 0.38        | -695.93   | -695.55   |
|                            |                    |                                     |                                                                               | Cameroon     | 60.82       | -4,271.57 | -4,210.75 |
|                            |                    |                                     |                                                                               | Congo        | 45.18       | -2,197.63 | -2,152.46 |
| Congo, Democratic Republic | -1.38              |                                     |                                                                               | -9,019.26    | -9,020.64   |           |           |
| Ethiopia                   | 15.30              |                                     |                                                                               | -8,146.25    | -8,130.95   |           |           |
| Gambia                     | 0.99               |                                     |                                                                               | -293.42      | -292.43     |           |           |
| Ghana                      | 21.87              |                                     |                                                                               | -3,403.20    | -3,381.33   |           |           |
| Guinea                     | 4.58               |                                     |                                                                               | -1,721.13    | -1,716.55   |           |           |
| Liberia                    | 0.13               |                                     |                                                                               | -483.09      | -482.96     |           |           |
| Malawi                     | 12.89              |                                     |                                                                               | -1,102.01    | -1,089.12   |           |           |
| Mali                       | 6.83               |                                     |                                                                               | -3,056.12    | -3,049.30   |           |           |
| Mauritania                 | 2.22               |                                     |                                                                               | -842.57      | -840.35     |           |           |
| Mozambique                 | 67.37              |                                     |                                                                               | -3,174.15    | -3,106.78   |           |           |
| Nigeria                    | 641.43             |                                     |                                                                               | -40,432.83   | -39,791.39  |           |           |
| Rwanda                     | 3.71               |                                     |                                                                               | -849.31      | -845.59     |           |           |

| HIV Prevalence | CCM implementation       | Country                      | Total Cost Savings = 2013 Guidelines - 2005 Guidelines (Thousands, US\$ 2013) |                      |                      |                          |
|----------------|--------------------------|------------------------------|-------------------------------------------------------------------------------|----------------------|----------------------|--------------------------|
|                |                          |                              | HIV+                                                                          | HIV-                 | Total                |                          |
| No             |                          | Sierra Leone                 | 1.01                                                                          | -854.28              | -853.27              |                          |
|                |                          | Togo                         | 5.67                                                                          | -851.70              | -846.03              |                          |
|                |                          | Uganda                       | 28.17                                                                         | -4,199.12            | -4,170.95            |                          |
|                |                          | Zambia                       | 106.51                                                                        | -2,073.81            | -1,967.29            |                          |
|                |                          | <b>Total</b>                 | <b>1,036.26</b>                                                               | <b>-93,774.39</b>    | <b>-92,738.14</b>    |                          |
|                |                          | Angola                       | 219.62                                                                        | -18,035.08           | -17,815.46           |                          |
|                |                          | Botswana                     | 118.48                                                                        | -1,723.48            | -1,605.01            |                          |
|                |                          | Central African Republic     | 5.71                                                                          | 152.92               | 158.64               |                          |
|                |                          | Chad                         | 28.48                                                                         | -3,367.77            | -3,339.29            |                          |
|                |                          | Côte d'Ivoire                | 72.20                                                                         | -5,733.55            | -5,661.34            |                          |
|                |                          | Djibouti                     | 1.65                                                                          | -203.13              | -201.48              |                          |
|                |                          | Equatorial Guinea            | 261.41                                                                        | -3,605.83            | -3,344.42            |                          |
|                |                          | Gabon                        | 58.04                                                                         | -2,104.47            | -2,046.44            |                          |
|                |                          | Guinea-Bissau                | 2.53                                                                          | -270.79              | -268.26              |                          |
|                |                          | Haiti                        | 3.97                                                                          | -953.21              | -949.24              |                          |
|                |                          | Kenya                        | 81.52                                                                         | -5,064.06            | -4,982.54            |                          |
|                |                          | Lesotho                      | 22.78                                                                         | -252.58              | -229.79              |                          |
|                |                          | Sao Tome and Principe        | 0.20                                                                          | -21.89               | -21.69               |                          |
|                |                          | South Africa                 | 3,361.71                                                                      | -32,904.18           | -29,542.47           |                          |
|                |                          | Sudan                        | 15.84                                                                         | -16,515.01           | -16,499.17           |                          |
|                |                          | Swaziland                    | 50.55                                                                         | -287.93              | -237.37              |                          |
|                |                          | Tanzania, United Republic of | 44.03                                                                         | -3,978.01            | -3,933.98            |                          |
|                |                          | Zimbabwe                     | 50.07                                                                         | -1,130.81            | -1,080.74            |                          |
|                |                          | <b>Total</b>                 | <b>4,398.79</b>                                                               | <b>-95,998.86</b>    | <b>-91,600.07</b>    |                          |
|                |                          |                              | <b>Subgroup (No. of countries)</b>                                            | <b>HIV +</b>         | <b>HIV -</b>         | <b>Total Cost Saving</b> |
|                |                          |                              | CCM (47)                                                                      | <b>1,702.77</b>      | <b>-1,004,529.89</b> | <b>-1,002,827.12</b>     |
|                |                          |                              | NO-CCM (27)                                                                   | <b>4,498.13</b>      | <b>-164,026.72</b>   | <b>-159,528.59</b>       |
|                | Low HIV Prevalence (34)  | <b>765.86</b>                | <b>-978,783.36</b>                                                            | <b>-978,017.50</b>   |                      |                          |
|                | High HIV Prevalence (40) | <b>5,435.05</b>              | <b>-189,773.25</b>                                                            | <b>-184,338.20</b>   |                      |                          |
|                | <b>TOTAL</b>             | <b>6,200.91</b>              | <b>-1,168,556.61</b>                                                          | <b>-1,162,355.70</b> |                      |                          |

## I. High cost scenario

### High cost scenario assumptions:

1. CCM Coverage: 100% coverage of rural population in countries with CCM
2. Unit cost of medicine changed based on review by Zhang et al 2015 (in press)

All other assumptions remain the same as the main model.

**Supplementary 2 table: Total cost of pneumonia treatment in a high cost scenario**

| Delivery Levels             | Total Cost for Pneumonia Treatment in 2013 |            |                  |        |            |
|-----------------------------|--------------------------------------------|------------|------------------|--------|------------|
|                             | (Billions, in US\$ 2013)                   |            |                  |        |            |
|                             | 2005 Guidelines                            |            | 2013 Guidelines( |        | 2013/2005% |
| Total Cost                  | %Total                                     | Total Cost | %Total           |        |            |
| <b>Community</b>            | 2.52                                       | 59.5%      | 2.51             | 83.3%  | 99.4%      |
| <b>First Level Facility</b> | 0.15                                       | 3.5%       | 0.17             | 5.8%   | 117.2%     |
| <b>Hospital</b>             | 1.57                                       | 37.0%      | 0.33             | 10.9%  | 21.0%      |
| <b>Total cost</b>           | 4.24                                       | 100%       | 3.01             | 100.0% | 71.0%      |

**Supplementary 3 table: Total cost of pneumonia treatment at national level by HIV status in a high cost scenario**

| Country                             | 2005 Guidelines (Thousands, US\$) |              |              | 2013 Guidelines(Thousands, US\$) |            |            | Total Cost Savings (Thousands, US\$) | 2013 Guidelines              |                                                          | National healthcare expenditure per capita (US\$) |
|-------------------------------------|-----------------------------------|--------------|--------------|----------------------------------|------------|------------|--------------------------------------|------------------------------|----------------------------------------------------------|---------------------------------------------------|
|                                     | HIV+                              | HIV-         | Total        | HIV+                             | HIV-       | Total      |                                      | Total cost per capita (US\$) | Proportion of national healthcare expenditure per capita |                                                   |
| Afghanistan                         | 4.79                              | 41,353.93    | 41,358.72    | 4.98                             | 32,271.29  | 32,276.27  | 9,082.44                             | 1.06                         | 1.89                                                     | 55.93                                             |
| Azerbaijan                          | 39.61                             | 11,549.23    | 11,588.85    | 53.66                            | 6,693.26   | 6,746.92   | 4,841.93                             | 0.72                         | 0.20                                                     | 356.92                                            |
| Bangladesh                          | 3.67                              | 141,956.16   | 141,959.83   | 3.96                             | 117,337.27 | 117,341.22 | 24,618.61                            | 0.75                         | 2.82                                                     | 26.54                                             |
| China                               | 89.67                             | 925,232.53   | 925,322.21   | 122.36                           | 720,361.46 | 720,483.83 | 204,838.38                           | 0.52                         | 0.19                                                     | 278.02                                            |
| Eritrea                             | 19.43                             | 7,012.79     | 7,032.22     | 23.88                            | 5,325.57   | 5,349.45   | 1,682.77                             | 0.84                         | 6.08                                                     | 13.90                                             |
| Guatemala                           | 20.64                             | 9,894.60     | 9,915.24     | 21.54                            | 8,188.10   | 8,209.65   | 1,705.59                             | 0.53                         | 0.25                                                     | 213.94                                            |
| India                               | 1,853.51                          | 1,466,513.18 | 1,468,366.70 | 2,381.22                         | 973,976.43 | 976,357.66 | 492,009.04                           | 0.78                         | 1.32                                                     | 59.10                                             |
| Indonesia                           | 143.61                            | 162,156.09   | 162,299.70   | 168.01                           | 131,798.36 | 131,966.38 | 30,333.32                            | 0.53                         | 0.56                                                     | 94.99                                             |
| Korea, Democratic People's Republic | 0.23                              | 14,801.09    | 14,801.32    | 0.30                             | 10,760.73  | 10,761.03  | 4,040.29                             | 0.43                         | 1.15                                                     | 37.62                                             |
| Kyrgyzstan                          | 0.50                              | 4,783.63     | 4,784.14     | 0.57                             | 3,809.90   | 3,810.47   | 973.66                               | 0.69                         | 0.96                                                     | 71.25                                             |
| Lao People's Democratic Republic    | 10.51                             | 6,499.48     | 6,509.99     | 12.11                            | 4,838.86   | 4,850.96   | 1,659.03                             | 0.72                         | 1.95                                                     | 36.74                                             |
| Madagascar                          | 65.36                             | 20,781.75    | 20,847.11    | 67.89                            | 16,767.74  | 16,835.62  | 4,011.49                             | 0.73                         | 3.87                                                     | 18.98                                             |
| Mexico                              | 45.88                             | 105,690.21   | 105,736.10   | 65.74                            | 43,507.76  | 43,573.50  | 62,162.60                            | 0.36                         | 0.06                                                     | 619.62                                            |
| Myanmar                             | 79.71                             | 43,523.94    | 43,603.64    | 89.04                            | 37,059.04  | 37,148.07  | 6,455.57                             | 0.70                         | 3.09                                                     | 22.54                                             |
| Nepal                               | 17.91                             | 26,244.24    | 26,262.15    | 18.97                            | 23,515.89  | 23,534.86  | 2,727.29                             | 0.85                         | 2.57                                                     | 33.00                                             |
| Niger                               | 88.48                             | 20,833.71    | 20,922.19    | 90.66                            | 16,739.41  | 16,830.06  | 4,092.12                             | 0.94                         | 4.69                                                     | 20.11                                             |
| Pakistan                            | 23.92                             | 174,406.13   | 174,430.05   | 26.98                            | 136,168.76 | 136,195.73 | 38,234.32                            | 0.75                         | 2.52                                                     | 29.70                                             |
| Papua New Guinea                    | 23.51                             | 8,413.58     | 8,437.08     | 28.05                            | 6,752.68   | 6,780.73   | 1,656.35                             | 0.93                         | 1.17                                                     | 78.87                                             |
| Peru                                | 20.40                             | 16,362.31    | 16,382.71    | 28.18                            | 8,773.92   | 8,802.10   | 7,580.61                             | 0.29                         | 0.10                                                     | 288.95                                            |
| Philippines                         | 4.03                              | 88,615.51    | 88,619.54    | 4.96                             | 59,653.38  | 59,658.34  | 28,961.20                            | 0.61                         | 0.63                                                     | 96.51                                             |
| Senegal                             | 43.30                             | 11,593.75    | 11,637.05    | 48.54                            | 8,972.44   | 9,020.97   | 2,616.08                             | 0.64                         | 0.95                                                     | 66.97                                             |
| Somalia                             | 56.99                             | 10,422.14    | 10,479.13    | 57.33                            | 7,903.28   | 7,960.61   | 2,518.52                             | 0.76                         | 19.65                                                    | 3.86                                              |
| Tajikistan                          | 5.71                              | 8,204.51     | 8,210.22     | 6.29                             | 6,779.03   | 6,785.32   | 1,424.90                             | 0.83                         | 1.53                                                     | 54.08                                             |

| Country                                 | 2005 Guidelines (Thousands, US\$) |           |           | 2013 Guidelines(Thousands, US\$) |           |           | Total Cost Savings (Thousands, US\$) | 2013 Guidelines              |                                                          | National healthcare expenditure per capita (US\$) |
|-----------------------------------------|-----------------------------------|-----------|-----------|----------------------------------|-----------|-----------|--------------------------------------|------------------------------|----------------------------------------------------------|---------------------------------------------------|
|                                         | HIV+                              | HIV-      | Total     | HIV+                             | HIV-      | Total     |                                      | Total cost per capita (US\$) | Proportion of national healthcare expenditure per capita |                                                   |
| <b>Turkmenistan</b>                     | 4.31                              | 5,680.81  | 5,685.12  | 5.81                             | 3,296.20  | 3,302.01  | 2,383.11                             | 0.63                         | 0.49                                                     | 129.07                                            |
| <b>Uzbekistan</b>                       | 29.98                             | 25,395.01 | 25,424.99 | 35.34                            | 19,996.99 | 20,032.33 | 5,392.65                             | 0.69                         | 0.78                                                     | 88.40                                             |
| <b>Yemen</b>                            | 16.06                             | 30,290.64 | 30,306.70 | 18.77                            | 20,594.14 | 20,612.91 | 9,693.79                             | 0.84                         | 0.96                                                     | 88.35                                             |
| <b>Bolivia (Plurinational State of)</b> | 4.59                              | 2,063.32  | 2,067.90  | 5.64                             | 615.55    | 621.19    | 1,446.71                             | 0.06                         | 0.05                                                     | 118.12                                            |
| <b>Brazil</b>                           | 16.95                             | 30,751.76 | 30,768.72 | 21.35                            | 8,372.61  | 8,393.97  | 22,374.75                            | 0.04                         | 0.004                                                    | 1,120.56                                          |
| <b>Cambodia</b>                         | 29.91                             | 2,325.99  | 2,355.90  | 32.75                            | 829.63    | 862.38    | 1,493.52                             | 0.06                         | 0.12                                                     | 51.21                                             |
| <b>Comoros</b>                          | 0.28                              | 695.00    | 695.27    | 0.29                             | 498.13    | 498.42    | 196.86                               | 0.77                         | 1.81                                                     | 42.55                                             |
| <b>Egypt</b>                            | 1.18                              | 15,579.34 | 15,580.52 | 1.48                             | 4,329.63  | 4,331.11  | 11,249.40                            | 0.06                         | 0.04                                                     | 136.58                                            |
| <b>Iraq</b>                             | 334.43                            | 31,006.42 | 31,340.85 | 412.44                           | 14,056.13 | 14,468.57 | 16,872.28                            | 0.47                         | 0.14                                                     | 331.59                                            |
| <b>Morocco</b>                          | 6.77                              | 11,527.88 | 11,534.65 | 8.07                             | 5,969.74  | 5,977.81  | 5,556.84                             | 0.20                         | 0.11                                                     | 185.89                                            |
| <b>Solomon Islands</b>                  | 0.94                              | 217.12    | 218.06    | 1.06                             | 106.71    | 107.77    | 110.29                               | 0.21                         | 0.16                                                     | 133.99                                            |
| <b>Viet Nam</b>                         | 86.43                             | 19,745.62 | 19,832.05 | 98.67                            | 7,390.32  | 7,488.99  | 12,343.06                            | 0.09                         | 0.09                                                     | 94.81                                             |
| <b>Benin</b>                            | 53.98                             | 7,896.64  | 7,950.62  | 58.70                            | 6,091.59  | 6,150.29  | 1,800.33                             | 0.60                         | 1.62                                                     | 36.70                                             |
| <b>Burkina Faso</b>                     | 158.95                            | 19,296.58 | 19,455.54 | 167.71                           | 14,107.88 | 14,275.59 | 5,179.95                             | 0.84                         | 2.27                                                     | 37.21                                             |
| <b>Burundi</b>                          | 79.42                             | 10,241.17 | 10,320.58 | 80.17                            | 9,384.00  | 9,464.17  | 856.42                               | 0.93                         | 3.99                                                     | 23.37                                             |
| <b>Cameroon</b>                         | 424.31                            | 16,442.50 | 16,866.81 | 486.61                           | 11,768.36 | 12,254.97 | 4,611.84                             | 0.55                         | 0.81                                                     | 68.24                                             |
| <b>Congo</b>                            | 155.34                            | 4,570.15  | 4,725.49  | 200.84                           | 2,278.13  | 2,478.97  | 2,246.52                             | 0.56                         | 0.64                                                     | 87.38                                             |
| <b>Congo, Democratic Republic</b>       | 539.44                            | 58,209.59 | 58,749.03 | 540.63                           | 47,401.89 | 47,942.52 | 10,806.51                            | 0.71                         | 3.60                                                     | 19.73                                             |
| <b>Ethiopia</b>                         | 692.27                            | 88,359.51 | 89,051.78 | 710.79                           | 78,813.55 | 79,524.34 | 9,527.45                             | 0.85                         | 5.09                                                     | 16.61                                             |
| <b>Gambia</b>                           | 15.75                             | 1,270.27  | 1,286.02  | 16.80                            | 935.08    | 951.88    | 334.14                               | 0.51                         | 1.88                                                     | 27.41                                             |
| <b>Ghana</b>                            | 138.53                            | 17,060.18 | 17,198.70 | 160.85                           | 13,358.45 | 13,519.30 | 3,679.40                             | 0.52                         | 0.70                                                     | 75.02                                             |
| <b>Guinea</b>                           | 116.96                            | 10,434.55 | 10,551.51 | 122.03                           | 8,428.03  | 8,550.06  | 2,001.45                             | 0.73                         | 2.45                                                     | 29.73                                             |
| <b>Liberia</b>                          | 21.45                             | 4,081.57  | 4,103.02  | 21.67                            | 3,501.68  | 3,523.35  | 579.67                               | 0.57                         | 1.03                                                     | 54.90                                             |
| <b>Malawi</b>                           | 608.95                            | 15,428.66 | 16,037.61 | 624.58                           | 14,114.16 | 14,738.74 | 1,298.87                             | 0.90                         | 2.91                                                     | 30.93                                             |
| <b>Mali</b>                             | 122.94                            | 15,410.62 | 15,533.56 | 130.26                           | 11,877.86 | 12,008.11 | 3,525.45                             | 0.78                         | 1.76                                                     | 44.57                                             |
| <b>Mauritania</b>                       | 20.47                             | 3,798.48  | 3,818.95  | 22.76                            | 2,857.39  | 2,880.15  | 938.80                               | 0.74                         | 1.28                                                     | 57.71                                             |

| Country                             | 2005 Guidelines (Thousands, US\$) |              |              | 2013 Guidelines(Thousands, US\$) |              |              | Total Cost Savings (Thousands, US\$) | 2013 Guidelines              |                                                          | National healthcare expenditure per capita (US\$) |
|-------------------------------------|-----------------------------------|--------------|--------------|----------------------------------|--------------|--------------|--------------------------------------|------------------------------|----------------------------------------------------------|---------------------------------------------------|
|                                     | HIV+                              | HIV-         | Total        | HIV+                             | HIV-         | Total        |                                      | Total cost per capita (US\$) | Proportion of national healthcare expenditure per capita |                                                   |
| <b>Mozambique</b>                   | 1,795.55                          | 25,845.05    | 27,640.59    | 1,869.72                         | 22,021.97    | 23,891.69    | 3,748.91                             | 0.92                         | 2.63                                                     | 35.22                                             |
| <b>Nigeria</b>                      | 4,545.67                          | 163,610.14   | 168,155.80   | 5,200.30                         | 119,295.14   | 124,495.44   | 43,660.37                            | 0.72                         | 0.90                                                     | 79.56                                             |
| <b>Rwanda</b>                       | 71.63                             | 10,673.84    | 10,745.47    | 75.64                            | 9,691.49     | 9,767.13     | 978.34                               | 0.83                         | 1.32                                                     | 62.72                                             |
| <b>Sierra Leone</b>                 | 50.23                             | 5,062.17     | 5,112.40     | 51.46                            | 4,055.25     | 4,106.71     | 1,005.69                             | 0.67                         | 0.98                                                     | 68.54                                             |
| <b>Togo</b>                         | 125.19                            | 5,566.03     | 5,691.22     | 131.40                           | 4,579.61     | 4,711.01     | 980.21                               | 0.69                         | 1.54                                                     | 44.88                                             |
| <b>Uganda</b>                       | 950.05                            | 37,474.71    | 38,424.76    | 972.01                           | 32,586.46    | 33,558.48    | 4,866.29                             | 0.89                         | 2.11                                                     | 42.40                                             |
| <b>Zambia</b>                       | 786.80                            | 11,860.99    | 12,647.79    | 891.27                           | 9,584.90     | 10,476.17    | 2,171.62                             | 0.72                         | 0.83                                                     | 87.22                                             |
| <b>Angola</b>                       | 635.97                            | 24,583.14    | 25,219.12    | 856.57                           | 6,024.95     | 6,881.52     | 18,337.60                            | 0.32                         | 0.17                                                     | 186.26                                            |
| <b>Botswana</b>                     | 283.79                            | 2,246.15     | 2,529.95     | 402.54                           | 494.63       | 897.17       | 1,632.77                             | 0.42                         | 0.10                                                     | 431.91                                            |
| <b>Central African Republic</b>     | 574.13                            | 7,560.54     | 8,134.67     | 580.58                           | 7,584.76     | 8,165.34     | -30.66                               | 1.77                         | 9.67                                                     | 18.28                                             |
| <b>Chad</b>                         | 355.45                            | 5,570.50     | 5,925.95     | 385.29                           | 1,774.13     | 2,159.42     | 3,766.53                             | 0.17                         | 0.48                                                     | 35.20                                             |
| <b>Côte d'Ivoire</b>                | 669.09                            | 10,846.73    | 11,515.81    | 743.44                           | 4,487.67     | 5,231.11     | 6,284.71                             | 0.26                         | 0.32                                                     | 79.43                                             |
| <b>Djibouti</b>                     | 11.96                             | 325.79       | 337.75       | 13.64                            | 103.45       | 117.09       | 220.66                               | 0.13                         | 0.13                                                     | 105.20                                            |
| <b>Equatorial Guinea</b>            | 521.30                            | 4,561.92     | 5,083.22     | 782.84                           | 942.26       | 1,725.10     | 3,358.11                             | 2.15                         | 0.17                                                     | 1,236.15                                          |
| <b>Gabon</b>                        | 132.09                            | 2,732.22     | 2,864.31     | 190.23                           | 601.46       | 791.69       | 2,072.62                             | 0.46                         | 0.13                                                     | 358.30                                            |
| <b>Guinea-Bissau</b>                | 50.33                             | 464.76       | 515.09       | 53.06                            | 153.73       | 206.79       | 308.29                               | 0.12                         | 0.32                                                     | 37.18                                             |
| <b>Haiti</b>                        | 66.57                             | 1,965.85     | 2,032.42     | 70.79                            | 875.70       | 946.49       | 1,085.94                             | 0.09                         | 0.16                                                     | 57.66                                             |
| <b>Kenya</b>                        | 1,251.93                          | 13,210.48    | 14,462.41    | 1,337.33                         | 7,428.01     | 8,765.34     | 5,697.07                             | 0.20                         | 0.54                                                     | 36.25                                             |
| <b>Lesotho</b>                      | 203.37                            | 395.33       | 598.70       | 226.89                           | 115.39       | 342.27       | 256.43                               | 0.16                         | 0.11                                                     | 141.10                                            |
| <b>Sao Tome and Principe</b>        | 1.89                              | 66.22        | 68.12        | 2.10                             | 42.04        | 44.14        | 23.98                                | 0.23                         | 0.19                                                     | 117.44                                            |
| <b>South Africa</b>                 | 8,288.46                          | 43,342.47    | 51,630.93    | 11,658.89                        | 9,847.35     | 21,506.24    | 30,124.69                            | 0.38                         | 0.06                                                     | 689.27                                            |
| <b>Sudan</b>                        | 146.87                            | 36,283.41    | 36,430.28    | 163.14                           | 17,989.64    | 18,152.78    | 18,277.51                            | 0.48                         | 0.46                                                     | 103.53                                            |
| <b>Swaziland</b>                    | 187.34                            | 430.54       | 617.88       | 238.27                           | 129.71       | 367.98       | 249.90                               | 0.28                         | 0.11                                                     | 264.81                                            |
| <b>Tanzania, United Republic of</b> | 1,445.94                          | 15,843.48    | 17,289.42    | 1,494.17                         | 11,086.63    | 12,580.80    | 4,708.63                             | 0.25                         | 0.68                                                     | 37.33                                             |
| <b>Zimbabwe</b>                     | 864.96                            | 2,239.95     | 3,104.91     | 918.25                           | 945.63       | 1,863.88     | 1,241.04                             | 0.13                         | 0.34                                                     | 38.38                                             |
| <b>Total</b>                        | 30,358.51                         | 4,207,386.31 | 4,237,744.82 | 36,621.06                        | 2,971,370.34 | 3,007,991.41 | 1,229,753.42                         |                              |                                                          |                                                   |



**Supplementary 4 table: Total DALYs averted and cost-effectiveness of implementing 2013 guidelines in a high cost scenario**

| Country                                    | Total DALY averted (Thousands) | Cost per DALY averted (US\$,2013) |        | Percentage of cost per DALY averted of GDP per capita (%) |       |
|--------------------------------------------|--------------------------------|-----------------------------------|--------|-----------------------------------------------------------|-------|
|                                            |                                | 2005                              | 2013   | 2005                                                      | 2013  |
| <b>Afghanistan</b>                         | 875.44                         | 47.24                             | 36.87  | 7.62                                                      | 5.95  |
| <b>Azerbaijan</b>                          | 45.64                          | 253.91                            | 147.82 | 3.43                                                      | 2.00  |
| <b>Bangladesh</b>                          | 910.09                         | 155.98                            | 128.93 | 20.87                                                     | 17.25 |
| <b>China</b>                               | 1,752.85                       | 527.90                            | 411.04 | 8.53                                                      | 6.64  |
| <b>Eritrea</b>                             | 98.98                          | 71.05                             | 54.04  | 14.09                                                     | 10.72 |
| <b>Guatemala</b>                           | 132.69                         | 74.73                             | 61.87  | 2.23                                                      | 1.85  |
| <b>India</b>                               | 8,522.64                       | 172.29                            | 114.56 | 11.57                                                     | 7.69  |
| <b>Indonesia</b>                           | 1,137.93                       | 142.63                            | 115.97 | 4.01                                                      | 3.26  |
| <b>Korea, Democratic People's Republic</b> | 82.09                          | 180.31                            | 131.09 | 35.63                                                     | 25.91 |
| <b>Kyrgyzstan</b>                          | 24.97                          | 191.60                            | 152.61 | 16.52                                                     | 13.16 |
| <b>Lao People's Democratic Republic</b>    | 124.61                         | 52.24                             | 38.93  | 3.73                                                      | 2.78  |
| <b>Madagascar</b>                          | 370.93                         | 56.20                             | 45.39  | 12.56                                                     | 10.14 |
| <b>Mexico</b>                              | 212.37                         | 497.88                            | 205.17 | 5.11                                                      | 2.10  |
| <b>Myanmar</b>                             | 327.07                         | 133.32                            | 113.58 | 11.65                                                     | 9.93  |
| <b>Nepal</b>                               | 165.78                         | 158.41                            | 141.96 | 22.42                                                     | 20.09 |
| <b>Niger</b>                               | 635.69                         | 32.91                             | 26.48  | 8.60                                                      | 6.92  |
| <b>Pakistan</b>                            | 3,212.46                       | 54.30                             | 42.40  | 4.21                                                      | 3.29  |
| <b>Papua New Guinea</b>                    | 96.55                          | 87.39                             | 70.23  | 4.00                                                      | 3.22  |
| <b>Peru</b>                                | 57.94                          | 282.76                            | 151.92 | 4.31                                                      | 2.31  |
| <b>Philippines</b>                         | 595.98                         | 148.70                            | 100.10 | 5.75                                                      | 3.87  |
| <b>Senegal</b>                             | 165.98                         | 70.11                             | 54.35  | 6.80                                                      | 5.27  |
| <b>Somalia</b>                             | 476.59                         | 21.99                             | 16.70  | 0.29                                                      | 0.22  |
| <b>Tajikistan</b>                          | 107.30                         | 76.52                             | 63.24  | 12.57                                                     | 10.39 |
| <b>Turkmenistan</b>                        | 46.83                          | 121.40                            | 70.51  | 1.86                                                      | 1.08  |
| <b>Uzbekistan</b>                          | 241.88                         | 105.11                            | 82.82  | 6.12                                                      | 4.82  |
| <b>Yemen</b>                               | 303.25                         | 99.94                             | 67.97  | 6.69                                                      | 4.55  |
| <b>Bolivia (Plurinational State of)</b>    | 81.97                          | 25.23                             | 7.97   | 0.98                                                      | 0.31  |
| <b>Brazil</b>                              | 167.92                         | 183.23                            | 50.14  | 1.62                                                      | 0.44  |
| <b>Cambodia</b>                            | 120.25                         | 19.59                             | 7.72   | 2.07                                                      | 0.82  |
| <b>Comoros</b>                             | 13.03                          | 53.36                             | 43.49  | 6.43                                                      | 5.24  |
| <b>Egypt</b>                               | 227.57                         | 68.47                             | 19.98  | 2.15                                                      | 0.63  |
| <b>Iraq</b>                                | 265.05                         | 118.25                            | 60.16  | 1.83                                                      | 0.93  |
| <b>Morocco</b>                             | 151.78                         | 75.99                             | 43.94  | 2.62                                                      | 1.51  |
| <b>Solomon Islands</b>                     | 4.47                           | 48.78                             | 26.77  | 3.21                                                      | 1.76  |
| <b>Viet Nam</b>                            | 214.59                         | 92.42                             | 37.85  | 5.79                                                      | 2.37  |
| <b>Benin</b>                               | 191.87                         | 41.44                             | 32.05  | 5.51                                                      | 4.26  |
| <b>Burkina Faso</b>                        | 390.63                         | 49.81                             | 36.55  | 7.85                                                      | 5.76  |
| <b>Burundi</b>                             | 250.15                         | 41.26                             | 37.83  | 16.44                                                     | 15.08 |
| <b>Cameroon</b>                            | 499.15                         | 33.79                             | 24.55  | 2.93                                                      | 2.13  |
| <b>Congo</b>                               | 37.44                          | 126.21                            | 66.21  | 4.00                                                      | 2.10  |
| <b>Congo,</b>                              | 1,770.31                       | 33.19                             | 27.08  | 12.20                                                     | 9.96  |

| Country                                | Total DALY averted<br>(Thousands) | Cost per DALY averted<br>(US\$,2013) |        | Percentage of cost<br>per DALY<br>averted of GDP<br>per capita (%) |       |
|----------------------------------------|-----------------------------------|--------------------------------------|--------|--------------------------------------------------------------------|-------|
|                                        |                                   | 2005                                 | 2013   | 2005                                                               | 2013  |
| <b>Democratic Republic of Ethiopia</b> | 1,568.40                          | 56.78                                | 50.70  | 12.07                                                              | 10.78 |
| <b>Gambia</b>                          | 29.69                             | 43.31                                | 32.06  | 8.46                                                               | 6.26  |
| <b>Ghana</b>                           | 352.92                            | 48.73                                | 38.31  | 3.04                                                               | 2.39  |
| <b>Guinea</b>                          | 224.05                            | 47.09                                | 38.16  | 7.97                                                               | 6.46  |
| <b>Liberia</b>                         | 64.60                             | 63.52                                | 54.54  | 15.06                                                              | 12.93 |
| <b>Malawi</b>                          | 215.99                            | 74.25                                | 68.24  | 27.70                                                              | 25.46 |
| <b>Mali</b>                            | 515.92                            | 30.11                                | 23.28  | 4.34                                                               | 3.35  |
| <b>Mauritania</b>                      | 80.87                             | 47.22                                | 35.61  | 4.27                                                               | 3.22  |
| <b>Mozambique</b>                      | 423.41                            | 65.28                                | 56.43  | 11.28                                                              | 9.75  |
| <b>Nigeria</b>                         | 4,499.06                          | 37.38                                | 27.67  | 2.40                                                               | 1.78  |
| <b>Rwanda</b>                          | 174.96                            | 61.42                                | 55.82  | 9.91                                                               | 9.00  |
| <b>Sierra Leone</b>                    | 184.08                            | 27.77                                | 22.31  | 4.37                                                               | 3.51  |
| <b>Togo</b>                            | 117.10                            | 48.60                                | 40.23  | 1.08                                                               | 0.90  |
| <b>Uganda</b>                          | 654.10                            | 58.74                                | 51.30  | 10.74                                                              | 9.38  |
| <b>Zambia</b>                          | 311.04                            | 40.66                                | 33.68  | 2.77                                                               | 2.29  |
| <b>Angola</b>                          | 971.25                            | 25.97                                | 7.00   | 0.47                                                               | 0.13  |
| <b>Botswana</b>                        | 9.75                              | 259.48                               | 87.27  | 3.61                                                               | 1.21  |
| <b>Central African Republic</b>        | 113.76                            | 71.51                                | 71.74  | 15.13                                                              | 15.18 |
| <b>Chad</b>                            | 516.30                            | 11.48                                | 4.15   | 1.30                                                               | 0.47  |
| <b>Côte d'Ivoire</b>                   | 391.80                            | 29.39                                | 13.27  | 2.36                                                               | 1.07  |
| <b>Djibouti</b>                        | 11.01                             | 30.67                                | 10.57  | 2.89                                                               | 1.00  |
| <b>Equatorial Guinea</b>               | 14.30                             | 355.51                               | 113.60 | 1.48                                                               | 0.47  |
| <b>Gabon</b>                           | 16.33                             | 175.43                               | 47.11  | 1.53                                                               | 0.41  |
| <b>Guinea-Bissau</b>                   | 41.79                             | 12.32                                | 4.91   | 2.28                                                               | 0.91  |
| <b>Haiti</b>                           | 172.73                            | 11.77                                | 5.47   | 1.53                                                               | 0.71  |
| <b>Kenya</b>                           | 817.99                            | 17.68                                | 10.67  | 2.04                                                               | 1.23  |
| <b>Lesotho</b>                         | 24.95                             | 23.99                                | 13.29  | 2.01                                                               | 1.11  |
| <b>Sao Tome and Principe</b>           | 2.46                              | 27.72                                | 17.93  | 1.98                                                               | 1.28  |
| <b>South Africa</b>                    | 320.65                            | 161.02                               | 62.97  | 10.19                                                              | 3.99  |
| <b>Sudan</b>                           | 772.94                            | 47.13                                | 23.48  | 1.55                                                               | 0.77  |
| <b>Swaziland</b>                       | 15.91                             | 38.83                                | 21.84  | 4.45                                                               | 2.50  |
| <b>Tanzania, United Republic of</b>    | 634.76                            | 27.24                                | 19.78  | 4.74                                                               | 3.44  |
| <b>Zimbabwe</b>                        | 238.01                            | 13.05                                | 7.72   | 1.66                                                               | 0.98  |
| <b>Total</b>                           | 39,613.61                         |                                      |        |                                                                    |       |
| <b>Median</b>                          | 212.37                            | 56.20                                |        |                                                                    |       |
| <b>(IQR)</b>                           | (82.00-493.51)                    | (34.69-120.61)                       |        |                                                                    |       |

## II. Low cost scenario

### Low cost scenario Assumptions:

1. CCM Coverage: coverage reduced to 50% coverage of rural population in countries with CCM, the remaining 50% were treated in health centre.
2. 1/5000 ratio of Community Health Works/ rural population\

All other assumptions are the same as the main model.

**Supplementary 5 table: Total cost of pneumonia treatment in a low cost scenario**

| Delivery Levels             | Total Cost for Pneumonia Treatments in 2013 |            |                 |        |             |
|-----------------------------|---------------------------------------------|------------|-----------------|--------|-------------|
|                             | (Billions, in US\$ 2013)                    |            |                 |        |             |
|                             | 2005 Guidelines                             |            | 2013 Guidelines |        | 2013/2005 % |
| Total Cost                  | %Total                                      | Total Cost | %Total          |        |             |
| <b>Community</b>            | 0.25                                        | 12.9%      | 0.25            | 32.6%  | 101.4%      |
| <b>First Level Facility</b> | 0.18                                        | 9.3%       | 0.23            | 29.0%  | 126.0%      |
| <b>Hospital</b>             | 1.51                                        | 77.8%      | 0.30            | 38.4%  | 19.9%       |
| <b>Total cost</b>           | 1.94                                        | 100%       | 0.78            | 100.0% | 40.3%       |

Supplementary 6 table: Total cost of pneumonia treatment by HIV status in a low cost scenario

| Country                             | 2005 Guidelines (Thousands) |              |              | 2013 Guidelines(Thousands) |            |            | Total Cost Savings (Thousands) | 2013 Guidelines       |                                                          |
|-------------------------------------|-----------------------------|--------------|--------------|----------------------------|------------|------------|--------------------------------|-----------------------|----------------------------------------------------------|
|                                     | HIV+                        | HIV-         | Total        | HIV+                       | HIV-       | Total      |                                | Total cost per capita | Proportion of national healthcare expenditure per capita |
| Afghanistan                         | 4.78                        | 34,135.63    | 34,140.41    | 4.95                       | 26,589.69  | 26,594.64  | 7,545.77                       | 0.57                  | 1.03                                                     |
| Azerbaijan                          | 39.30                       | 9,656.73     | 9,696.03     | 53.31                      | 4,907.24   | 4,960.54   | 4,735.49                       | 0.35                  | 0.10                                                     |
| Bangladesh                          | 3.03                        | 84,736.32    | 84,739.35    | 3.30                       | 63,016.38  | 63,019.68  | 21,719.66                      | 0.12                  | 0.47                                                     |
| China                               | 83.52                       | 586,413.86   | 586,497.37   | 116.07                     | 386,959.53 | 387,075.60 | 199,421.77                     | 0.09                  | 0.03                                                     |
| Eritrea                             | 17.15                       | 4,497.40     | 4,514.55     | 21.54                      | 2,910.33   | 2,931.87   | 1,582.68                       | 0.16                  | 1.13                                                     |
| Guatemala                           | 16.60                       | 5,851.12     | 5,867.72     | 17.41                      | 4,377.21   | 4,394.63   | 1,473.09                       | 0.09                  | 0.04                                                     |
| India                               | 1,669.57                    | 1,024,440.35 | 1,026,109.93 | 2,193.12                   | 553,627.25 | 555,820.37 | 470,289.56                     | 0.18                  | 0.30                                                     |
| Indonesia                           | 125.39                      | 100,469.43   | 100,594.82   | 149.35                     | 72,455.25  | 72,604.59  | 27,990.23                      | 0.10                  | 0.10                                                     |
| Korea, Democratic People's Republic | 0.21                        | 9,792.33     | 9,792.54     | 0.27                       | 5,919.03   | 5,919.30   | 3,873.24                       | 0.08                  | 0.22                                                     |
| Kyrgyzstan                          | 0.43                        | 2,949.80     | 2,950.22     | 0.49                       | 2,068.64   | 2,069.13   | 881.09                         | 0.12                  | 0.17                                                     |
| Lao People's Democratic Republic    | 8.92                        | 4,182.93     | 4,191.84     | 10.47                      | 2,662.95   | 2,673.42   | 1,518.42                       | 0.14                  | 0.38                                                     |
| Madagascar                          | 54.14                       | 12,884.32    | 12,938.46    | 56.38                      | 9,443.03   | 9,499.41   | 3,439.05                       | 0.15                  | 0.80                                                     |
| Mexico                              | 44.11                       | 91,613.44    | 91,657.55    | 63.93                      | 30,279.36  | 30,343.29  | 61,314.27                      | 0.16                  | 0.03                                                     |
| Myanmar                             | 67.27                       | 25,527.24    | 25,594.51    | 76.30                      | 19,704.29  | 19,780.59  | 5,813.92                       | 0.11                  | 0.49                                                     |
| Nepal                               | 15.35                       | 14,976.83    | 14,992.18    | 16.34                      | 12,608.62  | 12,624.96  | 2,367.23                       | 0.13                  | 0.40                                                     |
| Niger                               | 80.04                       | 14,302.62    | 14,382.67    | 81.83                      | 10,883.19  | 10,965.02  | 3,417.64                       | 0.30                  | 1.47                                                     |
| Pakistan                            | 21.97                       | 120,173.52   | 120,195.50   | 24.95                      | 85,654.55  | 85,679.50  | 34,516.00                      | 0.22                  | 0.75                                                     |
| Papua New Guinea                    | 20.99                       | 5,268.41     | 5,289.40     | 25.47                      | 3,725.83   | 3,751.30   | 1,538.11                       | 0.17                  | 0.22                                                     |
| Peru                                | 19.10                       | 12,763.31    | 12,782.41    | 26.85                      | 5,350.99   | 5,377.84   | 7,404.57                       | 0.09                  | 0.03                                                     |
| Philippines                         | 3.61                        | 62,967.52    | 62,971.13    | 4.54                       | 35,656.88  | 35,661.42  | 27,309.71                      | 0.16                  | 0.17                                                     |
| Senegal                             | 37.10                       | 7,458.85     | 7,495.95     | 42.18                      | 5,093.66   | 5,135.84   | 2,360.11                       | 0.14                  | 0.21                                                     |
| Somalia                             | 47.85                       | 7,093.02     | 7,140.86     | 47.93                      | 5,005.91   | 5,053.84   | 2,087.03                       | 0.24                  | 6.22                                                     |
| Tajikistan                          | 5.36                        | 5,479.34     | 5,484.70     | 5.92                       | 4,216.14   | 4,222.05   | 1,262.65                       | 0.23                  | 0.42                                                     |
| Turkmenistan                        | 4.00                        | 4,301.07     | 4,305.08     | 5.50                       | 1,986.10   | 1,991.60   | 2,313.48                       | 0.18                  | 0.14                                                     |

| Country                                 | 2005 Guidelines (Thousands) |           |           | 2013 Guidelines(Thousands) |           |           | Total Cost Savings (Thousands) | 2013 Guidelines       |                                                          |
|-----------------------------------------|-----------------------------|-----------|-----------|----------------------------|-----------|-----------|--------------------------------|-----------------------|----------------------------------------------------------|
|                                         | HIV+                        | HIV-      | Total     | HIV+                       | HIV-      | Total     |                                | Total cost per capita | Proportion of national healthcare expenditure per capita |
| <b>Uzbekistan</b>                       | 26.54                       | 16,226.31 | 16,252.84 | 31.81                      | 11,232.11 | 11,263.92 | 4,988.92                       | 0.14                  | 0.16                                                     |
| <b>Yemen</b>                            | 14.65                       | 22,461.41 | 22,476.07 | 17.31                      | 13,533.47 | 13,550.78 | 8,925.28                       | 0.29                  | 0.33                                                     |
| <b>Bolivia (Plurinational State of)</b> | 4.06                        | 1,948.07  | 1,952.13  | 5.10                       | 577.56    | 582.66    | 1,369.47                       | 0.06                  | 0.05                                                     |
| <b>Brazil</b>                           | 15.10                       | 29,158.90 | 29,174.00 | 19.46                      | 7,847.54  | 7,867.01  | 21,306.99                      | 0.04                  | 0.004                                                    |
| <b>Cambodia</b>                         | 24.87                       | 2,097.41  | 2,122.28  | 27.60                      | 754.28    | 781.88    | 1,340.40                       | 0.06                  | 0.11                                                     |
| <b>Comoros</b>                          | 0.25                        | 661.70    | 661.95    | 0.26                       | 487.15    | 487.41    | 174.54                         | 0.76                  | 1.78                                                     |
| <b>Egypt</b>                            | 1.05                        | 14,799.49 | 14,800.54 | 1.35                       | 4,072.57  | 4,073.92  | 10,726.63                      | 0.05                  | 0.04                                                     |
| <b>Iraq</b>                             | 310.48                      | 30,063.38 | 30,373.86 | 387.99                     | 13,745.27 | 14,133.26 | 16,240.60                      | 0.46                  | 0.14                                                     |
| <b>Morocco</b>                          | 6.27                        | 11,156.99 | 11,163.26 | 7.55                       | 5,847.48  | 5,855.04  | 5,308.22                       | 0.20                  | 0.11                                                     |
| <b>Solomon Islands</b>                  | 0.83                        | 204.44    | 205.27    | 0.95                       | 102.53    | 103.48    | 101.79                         | 0.21                  | 0.15                                                     |
| <b>Viet Nam</b>                         | 74.25                       | 18,278.60 | 18,352.85 | 86.23                      | 6,906.74  | 6,992.97  | 11,359.88                      | 0.08                  | 0.09                                                     |
| <b>Benin</b>                            | 43.96                       | 4,878.91  | 4,922.87  | 48.47                      | 3,275.94  | 3,324.41  | 1,598.46                       | 0.11                  | 0.30                                                     |
| <b>Burkina Faso</b>                     | 132.04                      | 12,763.14 | 12,895.19 | 140.12                     | 8,259.09  | 8,399.21  | 4,495.98                       | 0.21                  | 0.57                                                     |
| <b>Burundi</b>                          | 75.95                       | 6,156.61  | 6,232.56  | 76.33                      | 5,460.68  | 5,537.02  | 695.55                         | 0.20                  | 0.85                                                     |
| <b>Cameroon</b>                         | 355.52                      | 10,737.84 | 11,093.36 | 416.34                     | 6,466.27  | 6,882.61  | 4,210.75                       | 0.12                  | 0.18                                                     |
| <b>Congo</b>                            | 140.61                      | 3,670.67  | 3,811.28  | 185.79                     | 1,473.04  | 1,658.82  | 2,152.46                       | 0.23                  | 0.27                                                     |
| <b>Congo, Democratic Republic</b>       | 429.87                      | 34,908.51 | 35,338.38 | 428.49                     | 25,889.25 | 26,317.74 | 9,020.64                       | 0.13                  | 0.68                                                     |
| <b>Ethiopia</b>                         | 552.14                      | 48,956.23 | 49,508.37 | 567.44                     | 40,809.98 | 41,377.42 | 8,130.95                       | 0.12                  | 0.71                                                     |
| <b>Gambia</b>                           | 13.10                       | 846.88    | 859.98    | 14.09                      | 553.47    | 567.55    | 292.43                         | 0.14                  | 0.51                                                     |
| <b>Ghana</b>                            | 118.24                      | 10,671.04 | 10,789.28 | 140.10                     | 7,267.84  | 7,407.95  | 3,381.33                       | 0.10                  | 0.13                                                     |
| <b>Guinea</b>                           | 99.32                       | 6,646.82  | 6,746.14  | 103.90                     | 4,925.69  | 5,029.59  | 1,716.55                       | 0.18                  | 0.60                                                     |
| <b>Liberia</b>                          | 17.86                       | 2,465.72  | 2,483.58  | 17.99                      | 1,982.63  | 2,000.62  | 482.96                         | 0.12                  | 0.22                                                     |
| <b>Malawi</b>                           | 543.94                      | 8,873.99  | 9,417.94  | 556.83                     | 7,771.98  | 8,328.82  | 1,089.12                       | 0.18                  | 0.59                                                     |
| <b>Mali</b>                             | 108.31                      | 10,637.06 | 10,745.37 | 115.13                     | 7,580.94  | 7,696.07  | 3,049.30                       | 0.25                  | 0.56                                                     |
| <b>Mauritania</b>                       | 18.69                       | 2,740.12  | 2,758.81  | 20.91                      | 1,897.56  | 1,918.47  | 840.35                         | 0.27                  | 0.46                                                     |
| <b>Mozambique</b>                       | 1,774.32                    | 18,813.27 | 20,587.58 | 1,841.68                   | 15,639.12 | 17,480.80 | 3,106.78                       | 0.41                  | 1.16                                                     |

| Country                             | 2005 Guidelines (Thousands) |              |              | 2013 Guidelines(Thousands) |              |              | Total Cost Savings (Thousands) | 2013 Guidelines       |                                                          |    |
|-------------------------------------|-----------------------------|--------------|--------------|----------------------------|--------------|--------------|--------------------------------|-----------------------|----------------------------------------------------------|----|
|                                     | HIV+                        | HIV-         | Total        | HIV+                       | HIV-         | Total        |                                | Total cost per capita | Proportion of national healthcare expenditure per capita | of |
| <b>Nigeria</b>                      | 4,233.83                    | 123,748.56   | 127,982.39   | 4,875.27                   | 83,315.73    | 88,190.99    | 39,791.39                      | 0.31                  | 0.39                                                     |    |
| <b>Rwanda</b>                       | 62.14                       | 6,052.42     | 6,114.56     | 65.85                      | 5,203.11     | 5,268.96     | 845.59                         | 0.13                  | 0.21                                                     |    |
| <b>Sierra Leone</b>                 | 41.06                       | 3,140.00     | 3,181.06     | 42.06                      | 2,285.72     | 2,327.79     | 853.27                         | 0.15                  | 0.21                                                     |    |
| <b>Togo</b>                         | 105.00                      | 3,433.18     | 3,538.18     | 110.67                     | 2,581.48     | 2,692.15     | 846.03                         | 0.15                  | 0.34                                                     |    |
| <b>Uganda</b>                       | 788.10                      | 21,666.61    | 22,454.70    | 816.27                     | 17,467.48    | 18,283.75    | 4,170.95                       | 0.16                  | 0.37                                                     |    |
| <b>Zambia</b>                       | 690.95                      | 7,479.67     | 8,170.62     | 797.46                     | 5,405.86     | 6,203.32     | 1,967.29                       | 0.19                  | 0.22                                                     |    |
| <b>Angola</b>                       | 588.79                      | 23,802.80    | 24,391.59    | 808.42                     | 5,767.72     | 6,576.13     | 17,815.46                      | 0.30                  | 0.16                                                     |    |
| <b>Botswana</b>                     | 270.49                      | 2,204.32     | 2,474.81     | 388.96                     | 480.84       | 869.80       | 1,605.01                       | 0.41                  | 0.09                                                     |    |
| <b>Central African Republic</b>     | 538.84                      | 7,368.55     | 7,907.39     | 544.55                     | 7,521.47     | 8,066.02     | -158.64                        | 1.75                  | 9.55                                                     |    |
| <b>Chad</b>                         | 289.80                      | 4,931.14     | 5,220.94     | 318.28                     | 1,563.37     | 1,881.65     | 3,339.29                       | 0.15                  | 0.41                                                     |    |
| <b>Côte d'Ivoire</b>                | 565.27                      | 9,913.63     | 10,478.90    | 637.47                     | 4,180.08     | 4,817.55     | 5,661.34                       | 0.24                  | 0.30                                                     |    |
| <b>Djibouti</b>                     | 10.07                       | 297.13       | 307.20       | 11.72                      | 94.00        | 105.72       | 201.48                         | 0.12                  | 0.11                                                     |    |
| <b>Equatorial Guinea</b>            | 514.83                      | 4,541.29     | 5,056.12     | 776.24                     | 935.46       | 1,711.70     | 3,344.42                       | 2.13                  | 0.17                                                     |    |
| <b>Gabon</b>                        | 127.20                      | 2,693.01     | 2,820.21     | 185.24                     | 588.53       | 773.77       | 2,046.44                       | 0.45                  | 0.13                                                     |    |
| <b>Guinea-Bissau</b>                | 40.40                       | 404.74       | 445.14       | 42.93                      | 133.95       | 176.88       | 268.26                         | 0.10                  | 0.28                                                     |    |
| <b>Haiti</b>                        | 54.97                       | 1,761.58     | 1,816.55     | 58.94                      | 808.36       | 867.31       | 949.24                         | 0.08                  | 0.15                                                     |    |
| <b>Kenya</b>                        | 1,064.89                    | 12,138.81    | 13,203.70    | 1,146.41                   | 7,074.75     | 8,221.16     | 4,982.54                       | 0.18                  | 0.51                                                     |    |
| <b>Lesotho</b>                      | 168.05                      | 354.51       | 522.56       | 190.83                     | 101.93       | 292.76       | 229.79                         | 0.14                  | 0.10                                                     |    |
| <b>Sao Tome and Principe</b>        | 1.68                        | 62.80        | 64.49        | 1.89                       | 40.91        | 42.80        | 21.69                          | 0.22                  | 0.19                                                     |    |
| <b>South Africa</b>                 | 7,868.39                    | 42,460.96    | 50,329.35    | 11,230.10                  | 9,556.77     | 20,786.88    | 29,542.47                      | 0.37                  | 0.05                                                     |    |
| <b>Sudan</b>                        | 126.39                      | 33,629.99    | 33,756.38    | 142.23                     | 17,114.97    | 17,257.20    | 16,499.17                      | 0.45                  | 0.44                                                     |    |
| <b>Swaziland</b>                    | 169.06                      | 411.29       | 580.35       | 219.61                     | 123.37       | 342.98       | 237.37                         | 0.26                  | 0.10                                                     |    |
| <b>Tanzania, United Republic of</b> | 1,243.91                    | 14,681.66    | 15,925.57    | 1,287.95                   | 10,703.65    | 11,991.59    | 3,933.98                       | 0.24                  | 0.65                                                     |    |
| <b>Zimbabwe</b>                     | 709.98                      | 1,996.04     | 2,706.02     | 760.05                     | 865.22       | 1,625.27     | 1,080.74                       | 0.11                  | 0.29                                                     |    |
| <b>Total</b>                        | 27,566.10                   | 2,911,933.58 | 2,939,499.68 | 33,767.00                  | 1,743,376.97 | 1,777,143.97 | 1,162,355.70                   |                       |                                                          |    |

**Supplementary 7 table: Total DALYs averted and cost-effectiveness of implementing 2013 guidelines in a low cost scenario**

| Country                             | Total DALY averted (Thousands) | Cost per DALY averted (US\$,2013) | Percentage of cost per DALY averted in GDP per capita (%) |       |      |      |
|-------------------------------------|--------------------------------|-----------------------------------|-----------------------------------------------------------|-------|------|------|
|                                     |                                |                                   | 2005                                                      | 2013  | 2005 | 2013 |
| Afghanistan                         | 875.44                         | 28.64                             | 20.02                                                     | 4.62  | 3.23 |      |
| Azerbaijan                          | 45.64                          | 175.32                            | 71.57                                                     | 2.37  | 0.97 |      |
| Bangladesh                          | 910.09                         | 45.29                             | 21.43                                                     | 6.06  | 2.87 |      |
| China                               | 1,752.85                       | 183.09                            | 69.32                                                     | 2.96  | 1.12 |      |
| Eritrea                             | 98.98                          | 26.08                             | 10.09                                                     | 5.17  | 2.00 |      |
| Guatemala                           | 132.69                         | 21.50                             | 10.40                                                     | 0.64  | 0.31 |      |
| India                               | 8,522.64                       | 81.22                             | 26.04                                                     | 5.45  | 1.75 |      |
| Indonesia                           | 1,137.93                       | 46.41                             | 21.81                                                     | 1.30  | 0.61 |      |
| Korea, Democratic People's Republic | 82.09                          | 72.59                             | 25.41                                                     | 14.35 | 5.02 |      |
| Kyrgyzstan                          | 24.97                          | 62.42                             | 27.13                                                     | 5.38  | 2.34 |      |
| Lao People's Democratic Republic    | 124.61                         | 19.78                             | 7.60                                                      | 1.41  | 0.54 |      |
| Madagascar                          | 370.93                         | 18.71                             | 9.44                                                      | 4.18  | 2.11 |      |
| Mexico                              | 212.37                         | 382.68                            | 93.97                                                     | 3.93  | 0.96 |      |
| Myanmar                             | 327.07                         | 35.70                             | 17.92                                                     | 3.12  | 1.57 |      |
| Nepal                               | 165.78                         | 36.42                             | 22.14                                                     | 5.15  | 3.13 |      |
| Niger                               | 635.69                         | 13.68                             | 8.31                                                      | 3.57  | 2.17 |      |
| Pakistan                            | 3,212.46                       | 23.38                             | 12.63                                                     | 1.81  | 0.98 |      |
| Papua New Guinea                    | 96.55                          | 29.03                             | 13.10                                                     | 1.33  | 0.60 |      |
| Peru                                | 57.94                          | 174.37                            | 46.57                                                     | 2.65  | 0.71 |      |
| Philippines                         | 595.98                         | 72.89                             | 27.07                                                     | 2.82  | 1.05 |      |
| Senegal                             | 165.98                         | 26.17                             | 11.95                                                     | 2.54  | 1.16 |      |
| Somalia                             | 476.59                         | 9.66                              | 5.28                                                      | 0.13  | 0.07 |      |
| Tajikistan                          | 107.30                         | 29.31                             | 17.54                                                     | 4.81  | 2.88 |      |
| Turkmenistan                        | 46.83                          | 69.66                             | 20.26                                                     | 1.07  | 0.31 |      |
| Uzbekistan                          | 241.88                         | 37.58                             | 16.95                                                     | 2.19  | 0.99 |      |
| Yemen                               | 303.25                         | 52.98                             | 23.55                                                     | 3.55  | 1.58 |      |
| Bolivia (Plurinational State of)    | 81.97                          | 23.81                             | 7.50                                                      | 0.92  | 0.29 |      |
| Brazil                              | 167.92                         | 173.73                            | 47.00                                                     | 1.53  | 0.41 |      |
| Cambodia                            | 120.25                         | 17.65                             | 7.05                                                      | 1.87  | 0.75 |      |
| Comoros                             | 13.03                          | 50.80                             | 42.64                                                     | 6.12  | 5.13 |      |
| Egypt                               | 227.57                         | 65.04                             | 18.85                                                     | 2.04  | 0.59 |      |
| Iraq                                | 265.05                         | 114.60                            | 58.90                                                     | 1.78  | 0.91 |      |
| Morocco                             | 151.78                         | 73.55                             | 43.13                                                     | 2.53  | 1.49 |      |
| Solomon Islands                     | 4.47                           | 45.92                             | 25.81                                                     | 3.02  | 1.70 |      |
| Viet Nam                            | 214.59                         | 85.53                             | 35.54                                                     | 5.36  | 2.23 |      |
| Benin                               | 191.87                         | 14.16                             | 5.83                                                      | 1.88  | 0.77 |      |
| Burkina Faso                        | 390.63                         | 20.65                             | 9.14                                                      | 3.26  | 1.44 |      |
| Burundi                             | 250.15                         | 10.87                             | 8.09                                                      | 4.33  | 3.22 |      |
| Cameroon                            | 499.15                         | 13.94                             | 5.50                                                      | 1.21  | 0.48 |      |
| Congo                               | 37.44                          | 85.04                             | 27.55                                                     | 2.70  | 0.87 |      |
| Congo,                              | 1,770.31                       | 10.24                             | 5.14                                                      | 3.76  | 1.89 |      |

| Country                             | Total DALY averted<br>(Thousands) | Cost per DALY averted<br>(US\$,2013) | Percentage of cost per DALY averted in GDP per capita (%) |       |       |      |
|-------------------------------------|-----------------------------------|--------------------------------------|-----------------------------------------------------------|-------|-------|------|
|                                     |                                   |                                      | 2005                                                      | 2013  | 2005  | 2013 |
| <b>Democratic Republic</b>          |                                   |                                      |                                                           |       |       |      |
| <b>Ethiopia</b>                     | 1,568.40                          | 12.24                                | 7.06                                                      | 2.60  | 1.50  |      |
| <b>Gambia</b>                       | 29.69                             | 18.64                                | 8.79                                                      | 3.64  | 1.72  |      |
| <b>Ghana</b>                        | 352.92                            | 16.87                                | 7.29                                                      | 1.05  | 0.45  |      |
| <b>Guinea</b>                       | 224.05                            | 16.98                                | 9.32                                                      | 2.87  | 1.58  |      |
| <b>Liberia</b>                      | 64.60                             | 19.14                                | 11.66                                                     | 4.54  | 2.77  |      |
| <b>Malawi</b>                       | 215.99                            | 18.82                                | 13.77                                                     | 7.02  | 5.14  |      |
| <b>Mali</b>                         | 515.92                            | 13.34                                | 7.43                                                      | 1.92  | 1.07  |      |
| <b>Mauritania</b>                   | 80.87                             | 23.19                                | 12.80                                                     | 2.10  | 1.16  |      |
| <b>Mozambique</b>                   | 423.41                            | 32.33                                | 25.00                                                     | 5.59  | 4.32  |      |
| <b>Nigeria</b>                      | 4,499.06                          | 20.90                                | 12.06                                                     | 1.34  | 0.78  |      |
| <b>Rwanda</b>                       | 174.96                            | 13.82                                | 8.99                                                      | 2.23  | 1.45  |      |
| <b>Sierra Leone</b>                 | 184.08                            | 9.48                                 | 4.84                                                      | 1.49  | 0.76  |      |
| <b>Togo</b>                         | 117.10                            | 16.21                                | 8.99                                                      | 0.36  | 0.20  |      |
| <b>Uganda</b>                       | 654.10                            | 15.51                                | 9.13                                                      | 2.83  | 1.67  |      |
| <b>Zambia</b>                       | 311.04                            | 15.23                                | 8.91                                                      | 1.04  | 0.61  |      |
| <b>Angola</b>                       | 971.25                            | 25.11                                | 6.68                                                      | 0.46  | 0.12  |      |
| <b>Botswana</b>                     | 9.75                              | 253.83                               | 84.47                                                     | 3.53  | 1.17  |      |
| <b>Central African Republic</b>     | 113.76                            | 69.51                                | 70.87                                                     | 14.71 | 14.99 |      |
| <b>Chad</b>                         | 516.30                            | 10.11                                | 3.62                                                      | 1.14  | 0.41  |      |
| <b>Côte d'Ivoire</b>                | 391.80                            | 26.75                                | 12.21                                                     | 2.15  | 0.98  |      |
| <b>Djibouti</b>                     | 11.01                             | 27.90                                | 9.54                                                      | 2.63  | 0.90  |      |
| <b>Equatorial Guinea</b>            | 14.30                             | 353.62                               | 112.66                                                    | 1.47  | 0.47  |      |
| <b>Gabon</b>                        | 16.33                             | 172.73                               | 46.01                                                     | 1.51  | 0.40  |      |
| <b>Guinea-Bissau</b>                | 41.79                             | 10.65                                | 4.20                                                      | 1.97  | 0.78  |      |
| <b>Haiti</b>                        | 172.73                            | 10.52                                | 5.01                                                      | 1.36  | 0.65  |      |
| <b>Kenya</b>                        | 817.99                            | 16.14                                | 10.00                                                     | 1.87  | 1.16  |      |
| <b>Lesotho</b>                      | 24.95                             | 20.94                                | 11.31                                                     | 1.76  | 0.95  |      |
| <b>Sao Tome and Principe</b>        | 2.46                              | 26.25                                | 17.38                                                     | 1.87  | 1.24  |      |
| <b>South Africa</b>                 | 320.65                            | 156.96                               | 60.73                                                     | 9.93  | 3.84  |      |
| <b>Sudan</b>                        | 772.94                            | 43.67                                | 22.32                                                     | 1.43  | 0.73  |      |
| <b>Swaziland</b>                    | 15.91                             | 36.47                                | 20.27                                                     | 4.18  | 2.32  |      |
| <b>Tanzania, United Republic of</b> | 634.76                            | 25.09                                | 18.85                                                     | 4.37  | 3.28  |      |
| <b>Zimbabwe</b>                     | 238.01                            | 11.37                                | 6.71                                                      | 1.44  | 0.85  |      |
| <b>Total</b>                        | 39,613.61                         |                                      |                                                           |       |       |      |
| <b>Median</b>                       | 212.37                            | 26.17                                | 12.80                                                     |       |       |      |
| <b>(IQR)</b>                        | (82.00-493.51)                    | (16.90-64.38)                        | (8.82-25.71)                                              |       |       |      |



### III. Effective access to care scenario

Based on data from published studies reporting effective access to care (product of geographic access, staff availability and medicine availability)

1. In countries without CCM in place, effective access rate for rural population is 9%
2. In countries with CCM in place, effective access rate for rural population is 30% in a typical setting

**Supplementary 8 table: Total cost of pneumonia treatment in 2013 using effective access to care scenario**

| Delivery Levels      | Total Cost for Pneumonia Treatment in 2013 |               |                 |               |              |
|----------------------|--------------------------------------------|---------------|-----------------|---------------|--------------|
|                      | (Billions, in US\$ 2013)                   |               |                 |               |              |
|                      | 2005 Guidelines                            |               | 2013 Guidelines |               | 2013/2005 %  |
| Total Cost           | % OG Total                                 | Total Cost    | % RG Total      |               |              |
| Community            | 1.25                                       | 55.7%         | 1.25            | 80.0%         | 100.1%       |
| First Level Facility | 0.11                                       | 4.9%          | 0.14            | 8.7%          | 123.9%       |
| Hospital             | 0.88                                       | 39.4%         | 0.18            | 11.3%         | 20.0%        |
| <b>Total cost</b>    | <b>2.24</b>                                | <b>100.0%</b> | <b>1.56</b>     | <b>100.0%</b> | <b>69.7%</b> |

Supplementary 9 table: Total cost of pneumonia treatment by HIV status using effective access to care scenario

| Country                             | 2005 Guidelines (Thousands) |            |            | 2013 Guidelines(Thousands) |            |            | Total Cost Savings (Thousands) | 2013 Guidelines       |                                                          |
|-------------------------------------|-----------------------------|------------|------------|----------------------------|------------|------------|--------------------------------|-----------------------|----------------------------------------------------------|
|                                     | HIV+                        | HIV-       | Total      | HIV+                       | HIV-       | Total      |                                | Total cost per capita | Proportion of national healthcare expenditure per capita |
| Afghanistan                         | 2.37                        | 22,983.10  | 22,985.46  | 2.45                       | 19,476.64  | 19,479.09  | 3,506.38                       | 0.64                  | 1.14                                                     |
| Azerbaijan                          | 27.23                       | 7,353.17   | 7,380.40   | 36.68                      | 4,145.55   | 4,182.23   | 3,198.17                       | 0.44                  | 0.12                                                     |
| Bangladesh                          | 1.53                        | 69,824.89  | 69,826.42  | 1.66                       | 58,995.22  | 58,996.88  | 10,829.54                      | 0.38                  | 1.42                                                     |
| China                               | 54.76                       | 498,861.94 | 498,916.70 | 76.06                      | 368,378.92 | 368,454.97 | 130,461.73                     | 0.27                  | 0.10                                                     |
| Eritrea                             | 7.75                        | 3,358.98   | 3,366.73   | 9.72                       | 2,645.94   | 2,655.66   | 711.06                         | 0.42                  | 3.02                                                     |
| Guatemala                           | 10.87                       | 5,143.65   | 5,154.53   | 11.40                      | 4,187.95   | 4,199.35   | 955.17                         | 0.27                  | 0.13                                                     |
| India                               | 870.08                      | 734,072.33 | 734,942.41 | 1,141.77                   | 489,753.22 | 490,894.99 | 244,047.43                     | 0.39                  | 0.66                                                     |
| Indonesia                           | 83.32                       | 86,960.50  | 87,043.82  | 99.01                      | 68,611.90  | 68,710.92  | 18,332.91                      | 0.27                  | 0.29                                                     |
| Korea, Democratic People's Republic | 0.15                        | 8,416.72   | 8,416.87   | 0.20                       | 5,619.39   | 5,619.59   | 2,797.29                       | 0.23                  | 0.60                                                     |
| Kyrgyzstan                          | 0.24                        | 2,412.91   | 2,413.14   | 0.27                       | 1,930.55   | 1,930.81   | 482.33                         | 0.35                  | 0.49                                                     |
| Lao People's Democratic Republic    | 4.85                        | 3,263.79   | 3,268.64   | 5.69                       | 2,443.38   | 2,449.07   | 819.57                         | 0.36                  | 0.98                                                     |
| Madagascar                          | 29.18                       | 10,445.32  | 10,474.50  | 30.36                      | 8,628.49   | 8,658.85   | 1,815.65                       | 0.38                  | 1.99                                                     |
| Mexico                              | 37.40                       | 79,663.01  | 79,700.42  | 54.18                      | 27,724.08  | 27,778.26  | 51,922.16                      | 0.23                  | 0.04                                                     |
| Myanmar                             | 35.99                       | 21,776.89  | 21,812.88  | 40.76                      | 18,699.48  | 18,740.24  | 3,072.64                       | 0.35                  | 1.56                                                     |
| Nepal                               | 6.56                        | 12,832.62  | 12,839.19  | 6.98                       | 11,840.68  | 11,847.65  | 991.53                         | 0.43                  | 1.29                                                     |
| Niger                               | 35.32                       | 10,360.75  | 10,396.07  | 36.08                      | 8,907.97   | 8,944.05   | 1,452.02                       | 0.50                  | 2.49                                                     |
| Pakistan                            | 12.63                       | 93,620.30  | 93,632.93  | 14.28                      | 74,519.50  | 74,533.78  | 19,099.16                      | 0.41                  | 1.38                                                     |
| Papua New Guinea                    | 8.21                        | 3,956.95   | 3,965.17   | 9.95                       | 3,359.61   | 3,369.55   | 595.61                         | 0.46                  | 0.58                                                     |
| Peru                                | 16.07                       | 11,272.29  | 11,288.36  | 22.59                      | 5,039.79   | 5,062.38   | 6,225.99                       | 0.17                  | 0.06                                                     |
| Philippines                         | 2.35                        | 49,581.11  | 49,583.46  | 2.94                       | 32,050.96  | 32,053.90  | 17,529.56                      | 0.33                  | 0.34                                                     |
| Senegal                             | 22.56                       | 6,098.60   | 6,121.16   | 25.59                      | 4,684.96   | 4,710.56   | 1,410.61                       | 0.33                  | 0.50                                                     |
| Somalia                             | 27.87                       | 5,510.87   | 5,538.74   | 27.92                      | 4,333.33   | 4,361.24   | 1,177.49                       | 0.42                  | 10.76                                                    |
| Tajikistan                          | 2.72                        | 4,247.62   | 4,250.35   | 2.99                       | 3,634.21   | 3,637.20   | 613.15                         | 0.44                  | 0.82                                                     |
| Turkmenistan                        | 2.58                        | 3,234.31   | 3,236.89   | 3.54                       | 1,750.36   | 1,753.89   | 1,482.99                       | 0.33                  | 0.26                                                     |

| Country                                 | 2005 Guidelines (Thousands) |           |           | 2013 Guidelines(Thousands) |           |           | Total Cost Savings (Thousands) | 2013 Guidelines       |                                                          |
|-----------------------------------------|-----------------------------|-----------|-----------|----------------------------|-----------|-----------|--------------------------------|-----------------------|----------------------------------------------------------|
|                                         | HIV+                        | HIV-      | Total     | HIV+                       | HIV-      | Total     |                                | Total cost per capita | Proportion of national healthcare expenditure per capita |
| <b>Uzbekistan</b>                       | 14.94                       | 13,076.41 | 13,091.35 | 17.86                      | 10,312.87 | 10,330.73 | 2,760.62                       | 0.36                  | 0.40                                                     |
| <b>Yemen</b>                            | 7.93                        | 15,916.27 | 15,924.20 | 9.33                       | 11,218.24 | 11,227.57 | 4,696.63                       | 0.46                  | 0.52                                                     |
| <b>Bolivia (Plurinational State of)</b> | 2.83                        | 1,359.93  | 1,362.76  | 3.56                       | 401.53    | 405.09    | 957.67                         | 0.04                  | 0.03                                                     |
| <b>Brazil</b>                           | 12.99                       | 25,078.55 | 25,091.54 | 16.74                      | 6,600.47  | 6,617.21  | 18,474.33                      | 0.03                  | 0.003                                                    |
| <b>Cambodia</b>                         | 6.76                        | 570.01    | 576.77    | 7.50                       | 204.99    | 212.49    | 364.28                         | 0.02                  | 0.03                                                     |
| <b>Comoros</b>                          | 0.09                        | 228.38    | 228.46    | 0.09                       | 168.13    | 168.22    | 60.24                          | 0.26                  | 0.61                                                     |
| <b>Egypt</b>                            | 0.51                        | 7,190.24  | 7,190.75  | 0.66                       | 1,978.63  | 1,979.29  | 5,211.46                       | 0.03                  | 0.02                                                     |
| <b>Iraq</b>                             | 215.74                      | 20,889.61 | 21,105.35 | 269.60                     | 9,550.93  | 9,820.53  | 11,284.82                      | 0.32                  | 0.10                                                     |
| <b>Morocco</b>                          | 3.82                        | 6,794.47  | 6,798.29  | 4.60                       | 3,561.05  | 3,565.65  | 3,232.64                       | 0.12                  | 0.06                                                     |
| <b>Solomon Islands</b>                  | 0.23                        | 56.46     | 56.69     | 0.26                       | 28.32     | 28.58     | 28.11                          | 0.06                  | 0.04                                                     |
| <b>Viet Nam</b>                         | 27.65                       | 6,806.54  | 6,834.19  | 32.11                      | 2,571.91  | 2,604.02  | 4,230.16                       | 0.03                  | 0.03                                                     |
| <b>Benin</b>                            | 27.17                       | 4,074.22  | 4,101.40  | 29.94                      | 3,089.34  | 3,119.28  | 982.12                         | 0.30                  | 0.82                                                     |
| <b>Burkina Faso</b>                     | 65.22                       | 9,399.75  | 9,464.97  | 69.14                      | 7,212.77  | 7,281.91  | 2,183.06                       | 0.43                  | 1.16                                                     |
| <b>Burundi</b>                          | 29.68                       | 5,097.29  | 5,126.97  | 29.82                      | 4,835.35  | 4,865.17  | 261.80                         | 0.48                  | 2.05                                                     |
| <b>Cameroon</b>                         | 237.32                      | 8,895.12  | 9,132.44  | 277.74                     | 6,055.97  | 6,333.71  | 2,798.72                       | 0.28                  | 0.42                                                     |
| <b>Congo</b>                            | 105.28                      | 2,947.56  | 3,052.84  | 138.97                     | 1,308.99  | 1,447.96  | 1,604.88                       | 0.33                  | 0.37                                                     |
| <b>Congo, Democratic Republic</b>       | 235.60                      | 28,962.86 | 29,198.46 | 234.85                     | 24,093.41 | 24,328.26 | 4,870.20                       | 0.36                  | 1.83                                                     |
| <b>Ethiopia</b>                         | 233.11                      | 42,589.05 | 42,822.16 | 239.52                     | 39,175.95 | 39,415.46 | 3,406.69                       | 0.42                  | 2.52                                                     |
| <b>Gambia</b>                           | 9.33                        | 717.10    | 726.43    | 10.03                      | 511.45    | 521.47    | 204.96                         | 0.28                  | 1.03                                                     |
| <b>Ghana</b>                            | 79.06                       | 9,149.47  | 9,228.53  | 93.56                      | 6,892.37  | 6,985.93  | 2,242.60                       | 0.27                  | 0.36                                                     |
| <b>Guinea</b>                           | 55.99                       | 5,383.43  | 5,439.42  | 58.50                      | 4,440.23  | 4,498.73  | 940.69                         | 0.38                  | 1.29                                                     |
| <b>Liberia</b>                          | 11.71                       | 2,166.24  | 2,177.95  | 11.79                      | 1,858.42  | 1,870.22  | 307.73                         | 0.30                  | 0.55                                                     |
| <b>Malawi</b>                           | 230.20                      | 7,635.97  | 7,866.17  | 235.48                     | 7,184.49  | 7,419.96  | 446.21                         | 0.45                  | 1.47                                                     |
| <b>Mali</b>                             | 61.18                       | 8,179.02  | 8,240.20  | 64.89                      | 6,515.06  | 6,579.96  | 1,660.24                       | 0.43                  | 0.96                                                     |
| <b>Mauritania</b>                       | 11.48                       | 2,125.86  | 2,137.34  | 12.79                      | 1,628.51  | 1,641.30  | 496.03                         | 0.42                  | 0.73                                                     |
| <b>Mozambique</b>                       | 986.58                      | 14,462.60 | 15,449.18 | 1,021.50                   | 12,817.44 | 13,838.93 | 1,610.24                       | 0.54                  | 1.52                                                     |

| Country                             | 2005 Guidelines (Thousands) |              |              | 2013 Guidelines(Thousands) |              |              | Total Cost Savings (Thousands) | 2013 Guidelines       |                                                          |
|-------------------------------------|-----------------------------|--------------|--------------|----------------------------|--------------|--------------|--------------------------------|-----------------------|----------------------------------------------------------|
|                                     | HIV+                        | HIV-         | Total        | HIV+                       | HIV-         | Total        |                                | Total cost per capita | Proportion of national healthcare expenditure per capita |
| <b>Nigeria</b>                      | 2,853.71                    | 97,968.95    | 100,822.65   | 3,268.98                   | 71,792.26    | 75,061.24    | 25,761.41                      | 0.43                  | 0.54                                                     |
| <b>Rwanda</b>                       | 27.64                       | 5,268.18     | 5,295.82     | 29.25                      | 4,899.86     | 4,929.11     | 366.71                         | 0.42                  | 0.67                                                     |
| <b>Sierra Leone</b>                 | 24.06                       | 2,595.81     | 2,619.88     | 24.64                      | 2,104.92     | 2,129.56     | 490.31                         | 0.35                  | 0.51                                                     |
| <b>Togo</b>                         | 60.84                       | 2,864.08     | 2,924.91     | 64.05                      | 2,381.95     | 2,446.00     | 478.91                         | 0.36                  | 0.80                                                     |
| <b>Uganda</b>                       | 326.97                      | 18,022.59    | 18,349.57    | 339.20                     | 16,305.36    | 16,644.56    | 1,705.01                       | 0.44                  | 1.04                                                     |
| <b>Zambia</b>                       | 405.28                      | 6,179.11     | 6,584.39     | 467.22                     | 4,988.60     | 5,455.82     | 1,128.57                       | 0.38                  | 0.43                                                     |
| <b>Angola</b>                       | 370.15                      | 14,963.65    | 15,333.79    | 508.21                     | 3,625.88     | 4,134.09     | 11,199.70                      | 0.19                  | 0.10                                                     |
| <b>Botswana</b>                     | 176.10                      | 1,435.08     | 1,611.18     | 253.23                     | 313.04       | 566.27       | 1,044.91                       | 0.27                  | 0.06                                                     |
| <b>Central African Republic</b>     | 240.03                      | 3,282.44     | 3,522.47     | 242.58                     | 3,350.56     | 3,593.14     | -70.67                         | 0.78                  | 4.26                                                     |
| <b>Chad</b>                         | 83.55                       | 1,421.72     | 1,505.28     | 91.76                      | 450.74       | 542.51       | 962.77                         | 0.04                  | 0.12                                                     |
| <b>Côte d'Ivoire</b>                | 314.77                      | 5,520.43     | 5,835.20     | 354.98                     | 2,327.69     | 2,682.67     | 3,152.53                       | 0.13                  | 0.17                                                     |
| <b>Djibouti</b>                     | 7.97                        | 235.11       | 243.08       | 9.27                       | 74.38        | 83.65        | 159.43                         | 0.10                  | 0.09                                                     |
| <b>Equatorial Guinea</b>            | 231.29                      | 2,040.21     | 2,271.50     | 348.73                     | 420.26       | 769.00       | 1,502.51                       | 0.96                  | 0.08                                                     |
| <b>Gabon</b>                        | 111.23                      | 2,354.94     | 2,466.17     | 161.98                     | 514.65       | 676.63       | 1,789.54                       | 0.39                  | 0.11                                                     |
| <b>Guinea-Bissau</b>                | 19.78                       | 198.20       | 217.98       | 21.02                      | 65.59        | 86.61        | 131.36                         | 0.05                  | 0.14                                                     |
| <b>Haiti</b>                        | 31.67                       | 1,014.95     | 1,046.62     | 33.96                      | 465.75       | 499.71       | 546.91                         | 0.05                  | 0.08                                                     |
| <b>Kenya</b>                        | 328.10                      | 3,740.01     | 4,068.11     | 353.21                     | 2,179.75     | 2,532.97     | 1,535.14                       | 0.06                  | 0.16                                                     |
| <b>Lesotho</b>                      | 57.29                       | 120.85       | 178.14       | 65.06                      | 34.75        | 99.80        | 78.34                          | 0.05                  | 0.03                                                     |
| <b>Sao Tome and Principe</b>        | 1.11                        | 41.49        | 42.60        | 1.25                       | 27.03        | 28.27        | 14.33                          | 0.15                  | 0.12                                                     |
| <b>South Africa</b>                 | 5,147.07                    | 27,775.63    | 32,922.70    | 7,346.12                   | 6,251.52     | 13,597.63    | 19,325.06                      | 0.24                  | 0.04                                                     |
| <b>Sudan</b>                        | 45.52                       | 12,112.82    | 12,158.34    | 51.23                      | 6,164.45     | 6,215.68     | 5,942.66                       | 0.16                  | 0.16                                                     |
| <b>Swaziland</b>                    | 47.90                       | 116.53       | 164.43       | 62.22                      | 34.95        | 97.18        | 67.26                          | 0.07                  | 0.03                                                     |
| <b>Tanzania, United Republic of</b> | 414.45                      | 4,891.70     | 5,306.15     | 429.12                     | 3,566.29     | 3,995.41     | 1,310.74                       | 0.08                  | 0.22                                                     |
| <b>Zimbabwe</b>                     | 313.32                      | 880.88       | 1,194.20     | 335.42                     | 381.84       | 717.26       | 476.95                         | 0.05                  | 0.13                                                     |
| <b>Total</b>                        | 15,614.82                   | 2,220,050.34 | 2,235,665.16 | 19,416.61                  | 1,538,300.92 | 1,557,717.53 | 677,947.63                     |                       |                                                          |

**Supplementary 10 table: Total DALYs averted and cost-effectiveness of implementing 2013 guidelines using effective access to care scenario**

| Country                             | Total DALY averted (Thousands) | Cost per DALY averted (US\$,2013) |        | Percentage of cost per DALY averted in GDP per capita (%) |       |
|-------------------------------------|--------------------------------|-----------------------------------|--------|-----------------------------------------------------------|-------|
|                                     |                                | 2005                              | 2013   | 2005                                                      | 2013  |
| Afghanistan                         | 875.44                         | 26.26                             | 22.25  | 4.24                                                      | 3.59  |
| Azerbaijan                          | 45.64                          | 161.70                            | 91.63  | 2.19                                                      | 1.24  |
| Bangladesh                          | 910.09                         | 76.72                             | 64.83  | 10.27                                                     | 8.67  |
| China                               | 1,752.85                       | 284.63                            | 210.20 | 4.60                                                      | 3.40  |
| Eritrea                             | 98.98                          | 34.01                             | 26.83  | 6.74                                                      | 5.32  |
| Guatemala                           | 132.69                         | 38.85                             | 31.65  | 1.16                                                      | 0.94  |
| India                               | 8,522.64                       | 86.23                             | 57.60  | 5.79                                                      | 3.87  |
| Indonesia                           | 1,137.93                       | 76.49                             | 60.38  | 2.15                                                      | 1.70  |
| Korea, Democratic People's Republic | 82.09                          | 102.53                            | 68.46  | 20.26                                                     | 13.53 |
| Kyrgyzstan                          | 24.97                          | 96.65                             | 77.33  | 8.33                                                      | 6.67  |
| Lao People's Democratic Republic    | 124.61                         | 26.23                             | 19.65  | 1.87                                                      | 1.40  |
| Madagascar                          | 370.93                         | 28.24                             | 23.34  | 6.31                                                      | 5.22  |
| Mexico                              | 212.37                         | 375.29                            | 130.80 | 3.85                                                      | 1.34  |
| Myanmar                             | 327.07                         | 66.69                             | 57.30  | 5.83                                                      | 5.01  |
| Nepal                               | 165.78                         | 77.45                             | 71.47  | 10.96                                                     | 10.11 |
| Niger                               | 635.69                         | 16.35                             | 14.07  | 4.27                                                      | 3.68  |
| Pakistan                            | 3,212.46                       | 29.15                             | 23.20  | 2.26                                                      | 1.80  |
| Papua New Guinea                    | 96.55                          | 41.07                             | 34.90  | 1.88                                                      | 1.60  |
| Peru                                | 57.94                          | 194.84                            | 87.38  | 2.97                                                      | 1.33  |
| Philippines                         | 595.98                         | 83.20                             | 53.78  | 3.22                                                      | 2.08  |
| Senegal                             | 165.98                         | 36.88                             | 28.38  | 3.57                                                      | 2.75  |
| Somalia                             | 476.59                         | 11.62                             | 9.15   | 0.15                                                      | 0.12  |
| Tajikistan                          | 107.30                         | 39.61                             | 33.90  | 6.51                                                      | 5.57  |
| Turkmenistan                        | 46.83                          | 69.12                             | 37.45  | 1.06                                                      | 0.58  |
| Uzbekistan                          | 241.88                         | 54.12                             | 42.71  | 3.15                                                      | 2.49  |
| Yemen                               | 303.25                         | 52.51                             | 37.02  | 3.51                                                      | 2.48  |
| Bolivia (Plurinational State of)    | 81.97                          | 16.62                             | 5.23   | 0.65                                                      | 0.20  |
| Brazil                              | 167.92                         | 149.42                            | 40.43  | 1.32                                                      | 0.36  |
| Cambodia                            | 120.25                         | 4.80                              | 1.92   | 0.51                                                      | 0.20  |
| Comoros                             | 13.03                          | 17.53                             | 14.72  | 2.11                                                      | 1.77  |
| Egypt                               | 227.57                         | 31.60                             | 9.16   | 0.99                                                      | 0.29  |
| Iraq                                | 265.05                         | 79.63                             | 40.93  | 1.23                                                      | 0.63  |
| Morocco                             | 151.78                         | 44.79                             | 26.27  | 1.54                                                      | 0.91  |
| Solomon Islands                     | 4.47                           | 12.68                             | 7.13   | 0.84                                                      | 0.47  |
| Viet Nam                            | 214.59                         | 31.85                             | 13.24  | 2.00                                                      | 0.83  |
| Benin                               | 191.87                         | 21.38                             | 16.26  | 2.84                                                      | 2.16  |
| Burkina Faso                        | 390.63                         | 24.23                             | 18.64  | 3.82                                                      | 2.94  |
| Burundi                             | 250.15                         | 20.50                             | 19.45  | 8.17                                                      | 7.75  |
| Cameroon                            | 499.15                         | 18.30                             | 12.69  | 1.59                                                      | 1.10  |
| Congo                               | 37.44                          | 81.53                             | 38.67  | 2.59                                                      | 1.23  |
| Congo,                              | 1,770.31                       | 16.49                             | 13.74  | 6.06                                                      | 5.05  |

| Country                                | Total DALY averted<br>(Thousands) | Cost per DALY averted<br>(US\$,2013) |               | Percentage of cost<br>per DALY averted<br>in GDP per capita<br>(%) |       |
|----------------------------------------|-----------------------------------|--------------------------------------|---------------|--------------------------------------------------------------------|-------|
|                                        |                                   | 2005                                 | 2013          | 2005                                                               | 2013  |
| <b>Democratic Republic of Ethiopia</b> | 1,568.40                          | 27.30                                | 25.13         | 5.81                                                               | 5.34  |
| <b>Gambia</b>                          | 29.69                             | 24.46                                | 17.56         | 4.78                                                               | 3.43  |
| <b>Ghana</b>                           | 352.92                            | 26.15                                | 19.79         | 1.63                                                               | 1.23  |
| <b>Guinea</b>                          | 224.05                            | 24.28                                | 20.08         | 4.11                                                               | 3.40  |
| <b>Liberia</b>                         | 64.60                             | 33.72                                | 28.95         | 8.00                                                               | 6.87  |
| <b>Malawi</b>                          | 215.99                            | 36.42                                | 34.35         | 13.59                                                              | 12.82 |
| <b>Mali</b>                            | 515.92                            | 15.97                                | 12.75         | 2.30                                                               | 1.84  |
| <b>Mauritania</b>                      | 80.87                             | 26.43                                | 20.29         | 2.39                                                               | 1.83  |
| <b>Mozambique</b>                      | 423.41                            | 36.49                                | 32.68         | 6.30                                                               | 5.65  |
| <b>Nigeria</b>                         | 4,499.06                          | 22.41                                | 16.68         | 1.44                                                               | 1.07  |
| <b>Rwanda</b>                          | 174.96                            | 30.27                                | 28.17         | 4.88                                                               | 4.54  |
| <b>Sierra Leone</b>                    | 184.08                            | 14.23                                | 11.57         | 2.24                                                               | 1.82  |
| <b>Togo</b>                            | 117.10                            | 24.98                                | 20.89         | 0.56                                                               | 0.46  |
| <b>Uganda</b>                          | 654.10                            | 28.05                                | 25.45         | 5.13                                                               | 4.65  |
| <b>Zambia</b>                          | 311.04                            | 21.17                                | 17.54         | 1.44                                                               | 1.19  |
| <b>Angola</b>                          | 971.25                            | 15.79                                | 4.20          | 0.29                                                               | 0.08  |
| <b>Botswana</b>                        | 9.75                              | 165.25                               | 54.99         | 2.30                                                               | 0.76  |
| <b>Central African Republic</b>        | 113.76                            | 30.97                                | 31.57         | 6.55                                                               | 6.68  |
| <b>Chad</b>                            | 516.30                            | 2.92                                 | 1.04          | 0.33                                                               | 0.12  |
| <b>Côte d'Ivoire</b>                   | 391.80                            | 14.89                                | 6.80          | 1.20                                                               | 0.55  |
| <b>Djibouti</b>                        | 11.01                             | 22.08                                | 7.54          | 2.08                                                               | 0.71  |
| <b>Equatorial Guinea</b>               | 14.30                             | 158.86                               | 50.61         | 0.66                                                               | 0.21  |
| <b>Gabon</b>                           | 16.33                             | 151.05                               | 40.23         | 1.32                                                               | 0.35  |
| <b>Guinea-Bissau</b>                   | 41.79                             | 5.22                                 | 2.06          | 0.97                                                               | 0.38  |
| <b>Haiti</b>                           | 172.73                            | 6.06                                 | 2.89          | 0.79                                                               | 0.37  |
| <b>Kenya</b>                           | 817.99                            | 4.97                                 | 3.08          | 0.58                                                               | 0.36  |
| <b>Lesotho</b>                         | 24.95                             | 7.14                                 | 3.86          | 0.60                                                               | 0.32  |
| <b>Sao Tome and Principe</b>           | 2.46                              | 17.34                                | 11.48         | 1.24                                                               | 0.82  |
| <b>South Africa</b>                    | 320.65                            | 102.68                               | 39.73         | 6.50                                                               | 2.51  |
| <b>Sudan</b>                           | 772.94                            | 15.73                                | 8.04          | 0.52                                                               | 0.26  |
| <b>Swaziland</b>                       | 15.91                             | 10.33                                | 5.74          | 1.18                                                               | 0.66  |
| <b>Tanzania, United Republic of</b>    | 634.76                            | 8.36                                 | 6.28          | 1.46                                                               | 1.09  |
| <b>Zimbabwe</b>                        | 238.01                            | 5.02                                 | 2.96          | 0.64                                                               | 0.38  |
| <b>Total</b>                           | 39,613.61                         |                                      |               |                                                                    |       |
| <b>Median</b>                          | 212.37                            | 28.05                                | 22.25         |                                                                    |       |
| <b>(IQR)</b>                           | (82.00-493.51)                    | (16.80-68.51)                        | (11.85-39.46) |                                                                    |       |

#### IV. New (unpublished) data for proportion of pneumonia signs in HIV+ children

In high HIV prevalence setting (Malawi) the proportion of pneumonia cases with fast breathing only/ chest indrawing/ dangerous signs has been reported 85%, 1.5%, 13.5% (Tim Colbourn, personal communication). These are program data reported by health workers trained in iCCM. We applied this split to the estimated number of HIV-infected children with pneumonia reported in the literature. Split for HIV uninfected children remained as before- i.e. 85%, 13%, 2%. All other assumptions remain the same as the main model.

**Supplementary 11 table: Total cost of pneumonia treatment in 2013 using unpublished data on proportion of clinical signs in children with pneumonia in a high HIV burden setting**

| Total Cost for Pneumonia Treatments in 2013 |                      |             |                     |               |              |
|---------------------------------------------|----------------------|-------------|---------------------|---------------|--------------|
| (Billions, in US\$ 2013)                    |                      |             |                     |               |              |
| Delivery Levels                             | 2005 Guidelines (OG) |             | 2013 Guidelines(RG) |               | 2013/2005 %  |
|                                             | Total Cost           | %Total      | Total Cost          | %Total        |              |
| Community                                   | 1.25                 | 42.3%       | 1.25                | 70.7%         | 100.3%       |
| First Level Facility                        | 0.18                 | 6.1%        | 0.23                | 12.8%         | 126.0%       |
| Hospital                                    | 1.52                 | 51.6%       | 0.29                | 16.5%         | 19.1%        |
| <b>Total cost</b>                           | <b>2.95</b>          | <b>100%</b> | <b>1.77</b>         | <b>100.0%</b> | <b>60.0%</b> |

**Supplementary 12 table: Total cost of pneumonia treatment by HIV status using unpublished data on proportion of clinical signs in children with pneumonia in high HIV burden settings**

| Country                                    | 2005 Guidelines (Thousands) |              |              | 2013 Guidelines(Thousands) |            |            | Total Cost Savings (Thousands) | 2013 Guidelines       |                                                          |
|--------------------------------------------|-----------------------------|--------------|--------------|----------------------------|------------|------------|--------------------------------|-----------------------|----------------------------------------------------------|
|                                            | HIV+                        | HIV-         | Total        | HIV+                       | HIV-       | Total      |                                | Total cost per capita | Proportion of national healthcare expenditure per capita |
| <b>Afghanistan</b>                         | 6.21                        | 34,135.63    | 34,141.84    | 5.24                       | 26,589.69  | 26,594.93  | 7,546.92                       | 0.87                  | 1.56                                                     |
| <b>Azerbaijan</b>                          | 54.66                       | 9,656.73     | 9,711.39     | 53.97                      | 4,907.24   | 4,961.21   | 4,750.18                       | 0.53                  | 0.15                                                     |
| <b>Bangladesh</b>                          | 4.29                        | 84,736.32    | 84,740.60    | 3.53                       | 63,016.38  | 63,019.91  | 21,720.69                      | 0.40                  | 1.52                                                     |
| <b>China</b>                               | 121.39                      | 586,413.86   | 586,535.25   | 118.11                     | 386,959.53 | 387,077.64 | 199,457.61                     | 0.28                  | 0.10                                                     |
| <b>Eritrea</b>                             | 24.65                       | 4,497.40     | 4,522.05     | 22.35                      | 2,910.33   | 2,932.68   | 1,589.37                       | 0.46                  | 3.33                                                     |
| <b>Guatemala</b>                           | 23.40                       | 5,851.12     | 5,874.51     | 18.78                      | 4,377.21   | 4,395.99   | 1,478.52                       | 0.28                  | 0.13                                                     |
| <b>India</b>                               | 2,412.75                    | 1,024,440.35 | 1,026,853.11 | 2,256.05                   | 553,627.25 | 555,883.30 | 470,969.81                     | 0.44                  | 0.75                                                     |
| <b>Indonesia</b>                           | 176.69                      | 100,469.43   | 100,646.12   | 156.11                     | 72,455.25  | 72,611.36  | 28,034.76                      | 0.29                  | 0.31                                                     |
| <b>Korea, Democratic People's Republic</b> | 0.30                        | 9,792.33     | 9,792.63     | 0.28                       | 5,919.03   | 5,919.31   | 3,873.32                       | 0.24                  | 0.63                                                     |
| <b>Kyrgyzstan</b>                          | 0.60                        | 2,949.80     | 2,950.40     | 0.52                       | 2,068.64   | 2,069.16   | 881.24                         | 0.37                  | 0.52                                                     |
| <b>Lao People's Democratic Republic</b>    | 12.73                       | 4,182.93     | 4,195.66     | 11.02                      | 2,662.95   | 2,673.97   | 1,521.69                       | 0.39                  | 1.08                                                     |
| <b>Madagascar</b>                          | 75.40                       | 12,884.32    | 12,959.72    | 60.71                      | 9,443.03   | 9,503.74   | 3,455.98                       | 0.41                  | 2.18                                                     |
| <b>Mexico</b>                              | 64.24                       | 91,613.44    | 91,677.68    | 64.51                      | 30,279.36  | 30,343.87  | 61,333.81                      | 0.25                  | 0.04                                                     |
| <b>Myanmar</b>                             | 95.27                       | 25,527.24    | 25,622.51    | 80.80                      | 19,704.29  | 19,785.08  | 5,837.42                       | 0.37                  | 1.65                                                     |
| <b>Nepal</b>                               | 21.35                       | 14,976.83    | 14,998.18    | 17.49                      | 12,608.62  | 12,626.11  | 2,372.07                       | 0.45                  | 1.38                                                     |
| <b>Niger</b>                               | 108.11                      | 14,302.62    | 14,410.73    | 87.78                      | 10,883.19  | 10,970.97  | 3,439.76                       | 0.62                  | 3.06                                                     |
| <b>Pakistan</b>                            | 29.93                       | 120,173.52   | 120,203.45   | 26.15                      | 85,654.55  | 85,680.70  | 34,522.76                      | 0.47                  | 1.58                                                     |
| <b>Papua New Guinea</b>                    | 29.82                       | 5,268.41     | 5,298.22     | 26.56                      | 3,725.83   | 3,752.39   | 1,545.84                       | 0.51                  | 0.65                                                     |
| <b>Peru</b>                                | 27.81                       | 12,763.31    | 12,791.12    | 27.26                      | 5,350.99   | 5,378.25   | 7,412.87                       | 0.18                  | 0.06                                                     |
| <b>Philippines</b>                         | 5.13                        | 62,967.52    | 62,972.64    | 4.69                       | 35,656.88  | 35,661.57  | 27,311.07                      | 0.36                  | 0.38                                                     |
| <b>Senegal</b>                             | 52.05                       | 7,458.85     | 7,510.90     | 44.53                      | 5,093.66   | 5,138.19   | 2,372.72                       | 0.36                  | 0.54                                                     |
| <b>Somalia</b>                             | 65.29                       | 7,093.02     | 7,158.31     | 51.83                      | 5,005.91   | 5,057.74   | 2,100.57                       | 0.48                  | 12.48                                                    |
| <b>Tajikistan</b>                          | 7.23                        | 5,479.34     | 5,486.57     | 6.23                       | 4,216.14   | 4,222.36   | 1,264.21                       | 0.51                  | 0.95                                                     |



| Country                                 | 2005 Guidelines (Thousands) |           |           | 2013 Guidelines(Thousands) |           |           | Total Cost Savings (Thousands) | 2013 Guidelines       |                                                          |
|-----------------------------------------|-----------------------------|-----------|-----------|----------------------------|-----------|-----------|--------------------------------|-----------------------|----------------------------------------------------------|
|                                         | HIV+                        | HIV-      | Total     | HIV+                       | HIV-      | Total     |                                | Total cost per capita | Proportion of national healthcare expenditure per capita |
| <b>Turkmenistan</b>                     | 5.80                        | 4,301.07  | 4,306.87  | 5.61                       | 1,986.10  | 1,991.71  | 2,315.16                       | 0.38                  | 0.29                                                     |
| <b>Uzbekistan</b>                       | 37.41                       | 16,226.31 | 16,263.72 | 33.21                      | 11,232.11 | 11,265.32 | 4,998.40                       | 0.39                  | 0.44                                                     |
| <b>Yemen</b>                            | 20.33                       | 22,461.41 | 22,481.74 | 18.06                      | 13,533.47 | 13,551.53 | 8,930.21                       | 0.56                  | 0.63                                                     |
| <b>Bolivia (Plurinational State of)</b> | 5.72                        | 1,948.07  | 1,953.78  | 5.26                       | 577.56    | 582.82    | 1,370.96                       | 0.06                  | 0.05                                                     |
| <b>Brazil</b>                           | 21.54                       | 29,158.90 | 29,180.44 | 20.04                      | 7,847.54  | 7,867.59  | 21,312.85                      | 0.04                  | 0.004                                                    |
| <b>Cambodia</b>                         | 34.32                       | 2,097.41  | 2,131.73  | 29.18                      | 754.28    | 783.47    | 1,348.26                       | 0.06                  | 0.11                                                     |
| <b>Comoros</b>                          | 0.30                        | 661.70    | 662.00    | 0.27                       | 487.15    | 487.42    | 174.58                         | 0.76                  | 1.78                                                     |
| <b>Egypt</b>                            | 1.49                        | 14,799.49 | 14,800.98 | 1.39                       | 4,072.57  | 4,073.96  | 10,727.03                      | 0.05                  | 0.04                                                     |
| <b>Iraq</b>                             | 412.44                      | 30,063.38 | 30,475.82 | 395.50                     | 13,745.27 | 14,140.77 | 16,335.05                      | 0.46                  | 0.14                                                     |
| <b>Morocco</b>                          | 8.11                        | 11,156.99 | 11,165.11 | 7.71                       | 5,847.48  | 5,855.20  | 5,309.91                       | 0.20                  | 0.11                                                     |
| <b>Solomon Islands</b>                  | 1.09                        | 204.44    | 205.53    | 0.98                       | 102.53    | 103.51    | 102.02                         | 0.21                  | 0.15                                                     |
| <b>Viet Nam</b>                         | 101.84                      | 18,278.60 | 18,380.45 | 90.05                      | 6,906.74  | 6,996.79  | 11,383.66                      | 0.08                  | 0.09                                                     |
| <b>Benin</b>                            | 62.63                       | 4,878.91  | 4,941.54  | 51.77                      | 3,275.94  | 3,327.71  | 1,613.83                       | 0.32                  | 0.88                                                     |
| <b>Burkina Faso</b>                     | 185.04                      | 12,763.14 | 12,948.19 | 150.42                     | 8,259.09  | 8,409.51  | 4,538.67                       | 0.50                  | 1.33                                                     |
| <b>Burundi</b>                          | 101.02                      | 6,156.61  | 6,257.63  | 81.89                      | 5,460.68  | 5,542.57  | 715.06                         | 0.55                  | 2.33                                                     |
| <b>Cameroon</b>                         | 509.17                      | 10,737.84 | 11,247.01 | 438.77                     | 6,466.27  | 6,905.04  | 4,341.96                       | 0.31                  | 0.45                                                     |
| <b>Congo</b>                            | 202.51                      | 3,670.67  | 3,873.18  | 190.72                     | 1,473.04  | 1,663.75  | 2,209.43                       | 0.37                  | 0.43                                                     |
| <b>Congo, Democratic Republic</b>       | 601.89                      | 34,908.51 | 35,510.40 | 467.42                     | 25,889.25 | 26,356.67 | 9,153.73                       | 0.39                  | 1.98                                                     |
| <b>Ethiopia</b>                         | 781.87                      | 48,956.23 | 49,738.10 | 616.02                     | 40,809.98 | 41,426.00 | 8,312.10                       | 0.44                  | 2.65                                                     |
| <b>Gambia</b>                           | 18.20                       | 846.88    | 865.09    | 15.04                      | 553.47    | 568.50    | 296.58                         | 0.31                  | 1.12                                                     |
| <b>Ghana</b>                            | 168.34                      | 10,671.04 | 10,839.38 | 147.01                     | 7,267.84  | 7,414.86  | 3,424.52                       | 0.29                  | 0.38                                                     |
| <b>Guinea</b>                           | 136.73                      | 6,646.82  | 6,783.55  | 111.40                     | 4,925.69  | 5,037.09  | 1,746.46                       | 0.43                  | 1.44                                                     |
| <b>Liberia</b>                          | 24.35                       | 2,465.72  | 2,490.07  | 19.42                      | 1,982.63  | 2,002.05  | 488.02                         | 0.32                  | 0.59                                                     |
| <b>Malawi</b>                           | 739.44                      | 8,873.99  | 9,613.44  | 598.20                     | 7,771.98  | 8,370.18  | 1,243.25                       | 0.51                  | 1.65                                                     |
| <b>Mali</b>                             | 147.36                      | 10,637.06 | 10,784.42 | 122.55                     | 7,580.94  | 7,703.49  | 3,080.93                       | 0.50                  | 1.13                                                     |
| <b>Mauritania</b>                       | 25.29                       | 2,740.12  | 2,765.41  | 21.95                      | 1,897.56  | 1,919.51  | 845.91                         | 0.49                  | 0.86                                                     |

| Country                             | 2005 Guidelines (Thousands) |              |              | 2013 Guidelines(Thousands) |              |              | Total Cost Savings (Thousands) | 2013 Guidelines       |                                                          |
|-------------------------------------|-----------------------------|--------------|--------------|----------------------------|--------------|--------------|--------------------------------|-----------------------|----------------------------------------------------------|
|                                     | HIV+                        | HIV-         | Total        | HIV+                       | HIV-         | Total        |                                | Total cost per capita | Proportion of national healthcare expenditure per capita |
| <b>Mozambique</b>                   | 2,291.26                    | 18,813.27    | 21,104.53    | 1,944.45                   | 15,639.12    | 17,583.57    | 3,520.95                       | 0.68                  | 1.93                                                     |
| <b>Nigeria</b>                      | 5,688.48                    | 123,748.56   | 129,437.04   | 5,074.64                   | 83,315.73    | 88,390.36    | 41,046.67                      | 0.51                  | 0.64                                                     |
| <b>Rwanda</b>                       | 85.87                       | 6,052.42     | 6,138.29     | 70.45                      | 5,203.11     | 5,273.56     | 864.73                         | 0.45                  | 0.71                                                     |
| <b>Sierra Leone</b>                 | 57.12                       | 3,140.00     | 3,197.12     | 45.47                      | 2,285.72     | 2,331.20     | 865.92                         | 0.38                  | 0.56                                                     |
| <b>Togo</b>                         | 145.54                      | 3,433.18     | 3,578.73     | 118.65                     | 2,581.48     | 2,700.13     | 878.59                         | 0.40                  | 0.88                                                     |
| <b>Uganda</b>                       | 1,104.52                    | 21,666.61    | 22,771.13    | 880.49                     | 17,467.48    | 18,347.97    | 4,423.15                       | 0.49                  | 1.15                                                     |
| <b>Zambia</b>                       | 965.35                      | 7,479.67     | 8,445.02     | 837.37                     | 5,405.86     | 6,243.24     | 2,201.78                       | 0.43                  | 0.49                                                     |
| <b>Angola</b>                       | 848.87                      | 23,802.80    | 24,651.67    | 823.20                     | 5,767.72     | 6,590.92     | 18,060.75                      | 0.28                  | 0.15                                                     |
| <b>Botswana</b>                     | 393.85                      | 2,204.32     | 2,598.17     | 393.13                     | 480.84       | 873.97       | 1,724.20                       | 0.28                  | 0.06                                                     |
| <b>Central African Republic</b>     | 593.11                      | 7,368.55     | 7,961.66     | 555.61                     | 7,521.47     | 8,077.08     | -115.42                        | 1.74                  | 9.54                                                     |
| <b>Chad</b>                         | 406.55                      | 4,931.14     | 5,337.69     | 338.85                     | 1,563.37     | 1,902.22     | 3,435.47                       | 0.14                  | 0.40                                                     |
| <b>Côte d'Ivoire</b>                | 773.93                      | 9,913.63     | 10,687.56    | 670.01                     | 4,180.08     | 4,850.09     | 5,837.47                       | 0.23                  | 0.29                                                     |
| <b>Djibouti</b>                     | 14.15                       | 297.13       | 311.28       | 12.31                      | 94.00        | 106.31       | 204.97                         | 0.12                  | 0.11                                                     |
| <b>Equatorial Guinea</b>            | 755.10                      | 4,541.29     | 5,296.39     | 778.27                     | 935.46       | 1,713.73     | 3,582.66                       | 1.36                  | 0.11                                                     |
| <b>Gabon</b>                        | 185.37                      | 2,693.01     | 2,878.37     | 186.77                     | 588.53       | 775.30       | 2,103.07                       | 0.37                  | 0.10                                                     |
| <b>Guinea-Bissau</b>                | 56.48                       | 404.74       | 461.21       | 46.04                      | 133.95       | 179.99       | 281.23                         | 0.10                  | 0.27                                                     |
| <b>Haiti</b>                        | 74.67                       | 1,761.58     | 1,836.25     | 62.58                      | 808.36       | 870.94       | 965.30                         | 0.08                  | 0.14                                                     |
| <b>Kenya</b>                        | 1,397.86                    | 12,138.81    | 13,536.67    | 1,205.03                   | 7,074.75     | 8,279.78     | 5,256.89                       | 0.18                  | 0.50                                                     |
| <b>Lesotho</b>                      | 237.46                      | 354.51       | 591.97       | 201.90                     | 101.93       | 303.83       | 288.14                         | 0.11                  | 0.08                                                     |
| <b>Sao Tome and Principe</b>        | 2.15                        | 62.80        | 64.96        | 1.95                       | 40.91        | 42.86        | 22.09                          | 0.22                  | 0.19                                                     |
| <b>South Africa</b>                 | 11,428.06                   | 42,460.96    | 53,889.02    | 11,361.75                  | 9,556.77     | 20,918.52    | 32,970.50                      | 0.23                  | 0.03                                                     |
| <b>Sudan</b>                        | 168.97                      | 33,629.99    | 33,798.95    | 148.65                     | 17,114.97    | 17,263.62    | 16,535.33                      | 0.45                  | 0.44                                                     |
| <b>Swaziland</b>                    | 239.27                      | 411.29       | 650.57       | 225.34                     | 123.37       | 348.71       | 301.86                         | 0.17                  | 0.06                                                     |
| <b>Tanzania, United Republic of</b> | 1,564.63                    | 14,681.66    | 16,246.29    | 1,351.26                   | 10,703.65    | 12,054.91    | 4,191.38                       | 0.24                  | 0.65                                                     |
| <b>Zimbabwe</b>                     | 970.42                      | 1,996.04     | 2,966.46     | 808.62                     | 865.22       | 1,673.84     | 1,292.61                       | 0.11                  | 0.27                                                     |
| <b>Total</b>                        | 38,222.58                   | 2,911,933.58 | 2,950,156.16 | 34,927.15                  | 1,743,376.97 | 1,778,304.12 | 1,171,852.04                   |                       |                                                          |

**Supplementary 13 table: Total DALYs averted and cost-effectiveness of implementing 2013 guidelines using unpublished data on proportion of clinical signs in children with pneumonia in high HIV burden settings**

| Country                                                | Total DALY averted<br>(Thousands) | Cost per DALY averted<br>(US\$,2013) |        | Percentage of cost per DALY averted in GDP<br>per capita (%) |       |
|--------------------------------------------------------|-----------------------------------|--------------------------------------|--------|--------------------------------------------------------------|-------|
|                                                        |                                   | 2005                                 | 2013   | 2005                                                         | 2013  |
| <b>Afghanistan</b>                                     | 875.44                            | 39.00                                | 30.38  | 6.29                                                         | 4.90  |
| <b>Azerbaijan</b>                                      | 45.64                             | 212.77                               | 108.70 | 2.88                                                         | 1.47  |
| <b>Bangladesh</b>                                      | 910.09                            | 93.11                                | 69.25  | 12.46                                                        | 9.27  |
| <b>China</b>                                           | 1,752.85                          | 334.62                               | 220.83 | 5.41                                                         | 3.57  |
| <b>Eritrea</b>                                         | 98.98                             | 45.69                                | 29.63  | 9.06                                                         | 5.88  |
| <b>Guatemala</b>                                       | 132.69                            | 44.27                                | 33.13  | 1.32                                                         | 0.99  |
| <b>India</b>                                           | 8,522.64                          | 120.49                               | 65.22  | 8.09                                                         | 4.38  |
| <b>Indonesia</b>                                       | 1,137.93                          | 88.45                                | 63.81  | 2.49                                                         | 1.79  |
| <b>Korea,<br/>Democratic<br/>People's<br/>Republic</b> | 82.09                             | 119.29                               | 72.11  | 23.58                                                        | 14.25 |
| <b>Kyrgyzstan</b>                                      | 24.97                             | 118.16                               | 82.87  | 10.19                                                        | 7.15  |
| <b>Lao People's<br/>Democratic<br/>Republic</b>        | 124.61                            | 33.67                                | 21.46  | 2.41                                                         | 1.53  |
| <b>Madagascar</b>                                      | 370.93                            | 34.94                                | 25.62  | 7.81                                                         | 5.73  |
| <b>Mexico</b>                                          | 212.37                            | 431.68                               | 142.88 | 4.43                                                         | 1.47  |
| <b>Myanmar</b>                                         | 327.07                            | 78.34                                | 60.49  | 6.85                                                         | 5.29  |
| <b>Nepal</b>                                           | 165.78                            | 90.47                                | 76.16  | 12.80                                                        | 10.78 |
| <b>Niger</b>                                           | 635.69                            | 22.67                                | 17.26  | 5.92                                                         | 4.51  |
| <b>Pakistan</b>                                        | 3,212.46                          | 37.42                                | 26.67  | 2.90                                                         | 2.07  |
| <b>Papua New<br/>Guinea</b>                            | 96.55                             | 54.88                                | 38.87  | 2.51                                                         | 1.78  |
| <b>Peru</b>                                            | 57.94                             | 220.77                               | 92.83  | 3.36                                                         | 1.41  |
| <b>Philippines</b>                                     | 595.98                            | 105.66                               | 59.84  | 4.08                                                         | 2.31  |
| <b>Senegal</b>                                         | 165.98                            | 45.25                                | 30.96  | 4.39                                                         | 3.00  |
| <b>Somalia</b>                                         | 476.59                            | 15.02                                | 10.61  | 0.20                                                         | 0.14  |
| <b>Tajikistan</b>                                      | 107.30                            | 51.13                                | 39.35  | 8.40                                                         | 6.46  |
| <b>Turkmenistan</b>                                    | 46.83                             | 91.97                                | 42.53  | 1.41                                                         | 0.65  |
| <b>Uzbekistan</b>                                      | 241.88                            | 67.24                                | 46.57  | 3.92                                                         | 2.71  |
| <b>Yemen</b>                                           | 303.25                            | 74.13                                | 44.69  | 4.96                                                         | 2.99  |
| <b>Bolivia<br/>(Plurinational<br/>State of)</b>        | 81.97                             | 23.83                                | 7.50   | 0.93                                                         | 0.29  |
| <b>Brazil</b>                                          | 167.92                            | 173.77                               | 47.01  | 1.53                                                         | 0.41  |
| <b>Cambodia</b>                                        | 120.25                            | 17.73                                | 7.07   | 1.87                                                         | 0.75  |
| <b>Comoros</b>                                         | 13.03                             | 50.81                                | 42.64  | 6.12                                                         | 5.13  |
| <b>Egypt</b>                                           | 227.57                            | 65.04                                | 18.85  | 2.04                                                         | 0.59  |
| <b>Iraq</b>                                            | 265.05                            | 114.98                               | 58.93  | 1.78                                                         | 0.91  |
| <b>Morocco</b>                                         | 151.78                            | 73.56                                | 43.14  | 2.53                                                         | 1.49  |
| <b>Solomon Islands</b>                                 | 4.47                              | 45.97                                | 25.81  | 3.03                                                         | 1.70  |
| <b>Viet Nam</b>                                        | 214.59                            | 85.65                                | 35.56  | 5.37                                                         | 2.23  |
| <b>Benin</b>                                           | 191.87                            | 25.75                                | 17.34  | 3.43                                                         | 2.31  |
| <b>Burkina Faso</b>                                    | 390.63                            | 33.15                                | 21.53  | 5.23                                                         | 3.39  |
| <b>Burundi</b>                                         | 250.15                            | 25.02                                | 22.16  | 9.97                                                         | 8.83  |
| <b>Cameroon</b>                                        | 499.15                            | 22.53                                | 13.83  | 1.96                                                         | 1.20  |
| <b>Congo</b>                                           | 37.44                             | 103.44                               | 44.43  | 3.28                                                         | 1.41  |
| <b>Congo,<br/>Democratic</b>                           | 1,770.31                          | 20.06                                | 14.89  | 7.38                                                         | 5.47  |

| Country                 | Total DALY averted<br>(Thousands) | Cost per DALY averted<br>(US\$,2013) |               | Percentage of cost per DALY averted in GDP<br>per capita (%) |       |
|-------------------------|-----------------------------------|--------------------------------------|---------------|--------------------------------------------------------------|-------|
|                         |                                   | 2005                                 | 2013          | 2005                                                         | 2013  |
| <b>Republic</b>         |                                   |                                      |               |                                                              |       |
| Ethiopia                | 1,568.40                          | 31.71                                | 26.41         | 6.74                                                         | 5.62  |
| Gambia                  | 29.69                             | 29.13                                | 19.15         | 5.69                                                         | 3.74  |
| Ghana                   | 352.92                            | 30.71                                | 21.01         | 1.91                                                         | 1.31  |
| Guinea                  | 224.05                            | 30.28                                | 22.48         | 5.12                                                         | 3.80  |
| Liberia                 | 64.60                             | 38.55                                | 30.99         | 9.14                                                         | 7.35  |
| Malawi                  | 215.99                            | 44.51                                | 38.75         | 16.60                                                        | 14.46 |
| Mali                    | 515.92                            | 20.90                                | 14.93         | 3.01                                                         | 2.15  |
| Mauritania              | 80.87                             | 34.19                                | 23.74         | 3.09                                                         | 2.15  |
| Mozambique              | 423.41                            | 49.84                                | 41.53         | 8.61                                                         | 7.17  |
| Nigeria                 | 4,499.06                          | 28.77                                | 19.65         | 1.85                                                         | 1.26  |
| Rwanda                  | 174.96                            | 35.08                                | 30.14         | 5.66                                                         | 4.86  |
| Sierra Leone            | 184.08                            | 17.37                                | 12.66         | 2.74                                                         | 1.99  |
| Togo                    | 117.10                            | 30.56                                | 23.06         | 0.68                                                         | 0.51  |
| Uganda                  | 654.10                            | 34.81                                | 28.05         | 6.36                                                         | 5.13  |
| Zambia                  | 311.04                            | 27.15                                | 20.07         | 1.85                                                         | 1.37  |
| Angola                  | 971.25                            | 25.38                                | 6.18          | 0.46                                                         | 0.11  |
| Botswana                | 9.75                              | 266.48                               | 57.62         | 3.71                                                         | 0.80  |
| <b>Central African</b>  |                                   |                                      |               |                                                              |       |
| Republic                | 113.76                            | 69.99                                | 70.77         | 14.81                                                        | 14.97 |
| Chad                    | 516.30                            | 10.34                                | 3.50          | 1.17                                                         | 0.40  |
| Côte d'Ivoire           | 391.80                            | 27.28                                | 11.81         | 2.19                                                         | 0.95  |
| Djibouti                | 11.01                             | 28.27                                | 9.21          | 2.66                                                         | 0.87  |
| <b>Equatorial</b>       |                                   |                                      |               |                                                              |       |
| Guinea                  | 14.30                             | 370.42                               | 72.24         | 1.54                                                         | 0.30  |
| Gabon                   | 16.33                             | 176.30                               | 38.15         | 1.54                                                         | 0.33  |
| Guinea-Bissau           | 41.79                             | 11.04                                | 4.07          | 2.05                                                         | 0.75  |
| Haiti                   | 172.73                            | 10.63                                | 4.96          | 1.38                                                         | 0.64  |
| Kenya                   | 817.99                            | 16.55                                | 9.78          | 1.91                                                         | 1.13  |
| Lesotho                 | 24.95                             | 23.73                                | 9.32          | 1.99                                                         | 0.78  |
| <b>Sao Tome and</b>     |                                   |                                      |               |                                                              |       |
| Principe                | 2.46                              | 26.43                                | 17.20         | 1.89                                                         | 1.23  |
| South Africa            | 320.65                            | 168.06                               | 37.57         | 10.64                                                        | 2.38  |
| Sudan                   | 772.94                            | 43.73                                | 22.27         | 1.44                                                         | 0.73  |
| Swaziland               | 15.91                             | 40.88                                | 13.27         | 4.69                                                         | 1.52  |
| <b>Tanzania, United</b> |                                   |                                      |               |                                                              |       |
| Republic of             | 634.76                            | 25.59                                | 18.70         | 4.46                                                         | 3.26  |
| Zimbabwe                | 238.01                            | 12.46                                | 6.26          | 1.58                                                         | 0.79  |
| <b>Total</b>            | 39,613.61                         | 74.47                                | 44.67         |                                                              |       |
| <b>Median</b>           | 212.37                            | 39.00                                | 26.67         |                                                              |       |
| <b>(IQR)</b>            | (82.00-493.51)                    | (26.61-87.75)                        | (17.28-44.62) |                                                              |       |

## V. High cost less effective scenario

### High cost less effective scenario assumptions:

1. CCM Coverage: 100% coverage of rural population in countries with CCM
2. Unit cost of medicine changed based on review by Zhang et al 2015 (in press)
3. Mortality reduction with 2013 guidelines: 36%, 2005 guidelines remain 70%.

All other assumptions are the same as the main model.

**Supplementary 14 table: Total cost of pneumonia treatment in a high cost less effective scenario**

| Delivery Levels             | Total Cost for Pneumonia Treatment in 2013 |            |                 |        |             |
|-----------------------------|--------------------------------------------|------------|-----------------|--------|-------------|
|                             | (Billions, in US\$ 2013)                   |            |                 |        |             |
|                             | 2005 Guidelines                            |            | 2013 Guidelines |        | 2013/2005 % |
| Total Cost                  | %Total                                     | Total Cost | %Total          |        |             |
| <b>Community</b>            | 2.52                                       | 59.5%      | 2.51            | 83.3%  | 99.4%       |
| <b>First Level Facility</b> | 0.15                                       | 3.5%       | 0.17            | 5.8%   | 117.2%      |
| <b>Hospital</b>             | 1.57                                       | 37.0%      | 0.33            | 10.9%  | 21.0%       |
| <b>Total cost</b>           | 4.24                                       | 100%       | 3.01            | 100.0% | 71.0%       |

**Supplementary 15 table: Total cost of pneumonia treatment at national level by HIV status in a high cost less effective scenario**

| Country                                    | 2005 Guidelines (Thousands) |              |              | 2013 Guidelines(Thousands) |            |            | Total Cost Savings (Thousands) | 2013 Guidelines       |                                                          |
|--------------------------------------------|-----------------------------|--------------|--------------|----------------------------|------------|------------|--------------------------------|-----------------------|----------------------------------------------------------|
|                                            | HIV+                        | HIV-         | Total        | HIV+                       | HIV-       | Total      |                                | Total cost per capita | Proportion of national healthcare expenditure per capita |
| <b>Afghanistan</b>                         | 4.79                        | 41,353.93    | 41,358.72    | 4.98                       | 32,271.29  | 32,276.27  | 9,082.44                       | 1.06                  | 1.89                                                     |
| <b>Azerbaijan</b>                          | 39.61                       | 11,549.23    | 11,588.85    | 53.66                      | 6,693.26   | 6,746.92   | 4,841.93                       | 0.72                  | 0.20                                                     |
| <b>Bangladesh</b>                          | 3.67                        | 141,956.16   | 141,959.83   | 3.96                       | 117,337.27 | 117,341.22 | 24,618.61                      | 0.75                  | 2.82                                                     |
| <b>China</b>                               | 89.67                       | 925,232.53   | 925,322.21   | 122.36                     | 720,361.46 | 720,483.83 | 204,838.38                     | 0.52                  | 0.19                                                     |
| <b>Eritrea</b>                             | 19.43                       | 7,012.79     | 7,032.22     | 23.88                      | 5,325.57   | 5,349.45   | 1,682.77                       | 0.84                  | 6.08                                                     |
| <b>Guatemala</b>                           | 20.64                       | 9,894.60     | 9,915.24     | 21.54                      | 8,188.10   | 8,209.65   | 1,705.59                       | 0.53                  | 0.25                                                     |
| <b>India</b>                               | 1,853.51                    | 1,466,513.18 | 1,468,366.70 | 2,381.22                   | 973,976.43 | 976,357.66 | 492,009.04                     | 0.78                  | 1.32                                                     |
| <b>Indonesia</b>                           | 143.61                      | 162,156.09   | 162,299.70   | 168.01                     | 131,798.36 | 131,966.38 | 30,333.32                      | 0.53                  | 0.56                                                     |
| <b>Korea, Democratic People's Republic</b> | 0.23                        | 14,801.09    | 14,801.32    | 0.30                       | 10,760.73  | 10,761.03  | 4,040.29                       | 0.43                  | 1.15                                                     |
| <b>Kyrgyzstan</b>                          | 0.50                        | 4,783.63     | 4,784.14     | 0.57                       | 3,809.90   | 3,810.47   | 973.66                         | 0.69                  | 0.96                                                     |
| <b>Lao People's Democratic Republic</b>    | 10.51                       | 6,499.48     | 6,509.99     | 12.11                      | 4,838.86   | 4,850.96   | 1,659.03                       | 0.72                  | 1.95                                                     |
| <b>Madagascar</b>                          | 65.36                       | 20,781.75    | 20,847.11    | 67.89                      | 16,767.74  | 16,835.62  | 4,011.49                       | 0.73                  | 3.87                                                     |
| <b>Mexico</b>                              | 45.88                       | 105,690.21   | 105,736.10   | 65.74                      | 43,507.76  | 43,573.50  | 62,162.60                      | 0.36                  | 0.06                                                     |
| <b>Myanmar</b>                             | 79.71                       | 43,523.94    | 43,603.64    | 89.04                      | 37,059.04  | 37,148.07  | 6,455.57                       | 0.70                  | 3.09                                                     |
| <b>Nepal</b>                               | 17.91                       | 26,244.24    | 26,262.15    | 18.97                      | 23,515.89  | 23,534.86  | 2,727.29                       | 0.85                  | 2.57                                                     |
| <b>Niger</b>                               | 88.48                       | 20,833.71    | 20,922.19    | 90.66                      | 16,739.41  | 16,830.06  | 4,092.12                       | 0.94                  | 4.69                                                     |
| <b>Pakistan</b>                            | 23.92                       | 174,406.13   | 174,430.05   | 26.98                      | 136,168.76 | 136,195.73 | 38,234.32                      | 0.75                  | 2.52                                                     |
| <b>Papua New Guinea</b>                    | 23.51                       | 8,413.58     | 8,437.08     | 28.05                      | 6,752.68   | 6,780.73   | 1,656.35                       | 0.93                  | 1.17                                                     |
| <b>Peru</b>                                | 20.40                       | 16,362.31    | 16,382.71    | 28.18                      | 8,773.92   | 8,802.10   | 7,580.61                       | 0.29                  | 0.10                                                     |
| <b>Philippines</b>                         | 4.03                        | 88,615.51    | 88,619.54    | 4.96                       | 59,653.38  | 59,658.34  | 28,961.20                      | 0.61                  | 0.63                                                     |
| <b>Senegal</b>                             | 43.30                       | 11,593.75    | 11,637.05    | 48.54                      | 8,972.44   | 9,020.97   | 2,616.08                       | 0.64                  | 0.95                                                     |
| <b>Somalia</b>                             | 56.99                       | 10,422.14    | 10,479.13    | 57.33                      | 7,903.28   | 7,960.61   | 2,518.52                       | 0.76                  | 19.65                                                    |
| <b>Tajikistan</b>                          | 5.71                        | 8,204.51     | 8,210.22     | 6.29                       | 6,779.03   | 6,785.32   | 1,424.90                       | 0.83                  | 1.53                                                     |
| <b>Turkmenistan</b>                        | 4.31                        | 5,680.81     | 5,685.12     | 5.81                       | 3,296.20   | 3,302.01   | 2,383.11                       | 0.63                  | 0.49                                                     |

| Country                                 | 2005 Guidelines (Thousands) |           |           | 2013 Guidelines(Thousands) |           |           | Total Cost Savings (Thousands) | 2013 Guidelines       |                                                          |
|-----------------------------------------|-----------------------------|-----------|-----------|----------------------------|-----------|-----------|--------------------------------|-----------------------|----------------------------------------------------------|
|                                         | HIV+                        | HIV-      | Total     | HIV+                       | HIV-      | Total     |                                | Total cost per capita | Proportion of national healthcare expenditure per capita |
| <b>Uzbekistan</b>                       | 29.98                       | 25,395.01 | 25,424.99 | 35.34                      | 19,996.99 | 20,032.33 | 5,392.65                       | 0.69                  | 0.78                                                     |
| <b>Yemen</b>                            | 16.06                       | 30,290.64 | 30,306.70 | 18.77                      | 20,594.14 | 20,612.91 | 9,693.79                       | 0.84                  | 0.96                                                     |
| <b>Bolivia (Plurinational State of)</b> | 4.59                        | 2,063.32  | 2,067.90  | 5.64                       | 615.55    | 621.19    | 1,446.71                       | 0.06                  | 0.05                                                     |
| <b>Brazil</b>                           | 16.95                       | 30,751.76 | 30,768.72 | 21.35                      | 8,372.61  | 8,393.97  | 22,374.75                      | 0.04                  | 0.004                                                    |
| <b>Cambodia</b>                         | 29.91                       | 2,325.99  | 2,355.90  | 32.75                      | 829.63    | 862.38    | 1,493.52                       | 0.06                  | 0.12                                                     |
| <b>Comoros</b>                          | 0.28                        | 695.00    | 695.27    | 0.29                       | 498.13    | 498.42    | 196.86                         | 0.77                  | 1.81                                                     |
| <b>Egypt</b>                            | 1.18                        | 15,579.34 | 15,580.52 | 1.48                       | 4,329.63  | 4,331.11  | 11,249.40                      | 0.06                  | 0.04                                                     |
| <b>Iraq</b>                             | 334.43                      | 31,006.42 | 31,340.85 | 412.44                     | 14,056.13 | 14,468.57 | 16,872.28                      | 0.47                  | 0.14                                                     |
| <b>Morocco</b>                          | 6.77                        | 11,527.88 | 11,534.65 | 8.07                       | 5,969.74  | 5,977.81  | 5,556.84                       | 0.20                  | 0.11                                                     |
| <b>Solomon Islands</b>                  | 0.94                        | 217.12    | 218.06    | 1.06                       | 106.71    | 107.77    | 110.29                         | 0.21                  | 0.16                                                     |
| <b>Viet Nam</b>                         | 86.43                       | 19,745.62 | 19,832.05 | 98.67                      | 7,390.32  | 7,488.99  | 12,343.06                      | 0.09                  | 0.09                                                     |
| <b>Benin</b>                            | 53.98                       | 7,896.64  | 7,950.62  | 58.70                      | 6,091.59  | 6,150.29  | 1,800.33                       | 0.60                  | 1.62                                                     |
| <b>Burkina Faso</b>                     | 158.95                      | 19,296.58 | 19,455.54 | 167.71                     | 14,107.88 | 14,275.59 | 5,179.95                       | 0.84                  | 2.27                                                     |
| <b>Burundi</b>                          | 79.42                       | 10,241.17 | 10,320.58 | 80.17                      | 9,384.00  | 9,464.17  | 856.42                         | 0.93                  | 3.99                                                     |
| <b>Cameroon</b>                         | 424.31                      | 16,442.50 | 16,866.81 | 486.61                     | 11,768.36 | 12,254.97 | 4,611.84                       | 0.55                  | 0.81                                                     |
| <b>Congo</b>                            | 155.34                      | 4,570.15  | 4,725.49  | 200.84                     | 2,278.13  | 2,478.97  | 2,246.52                       | 0.56                  | 0.64                                                     |
| <b>Congo, Democratic Republic</b>       | 539.44                      | 58,209.59 | 58,749.03 | 540.63                     | 47,401.89 | 47,942.52 | 10,806.51                      | 0.71                  | 3.60                                                     |
| <b>Ethiopia</b>                         | 692.27                      | 88,359.51 | 89,051.78 | 710.79                     | 78,813.55 | 79,524.34 | 9,527.45                       | 0.85                  | 5.09                                                     |
| <b>Gambia</b>                           | 15.75                       | 1,270.27  | 1,286.02  | 16.80                      | 935.08    | 951.88    | 334.14                         | 0.51                  | 1.88                                                     |
| <b>Ghana</b>                            | 138.53                      | 17,060.18 | 17,198.70 | 160.85                     | 13,358.45 | 13,519.30 | 3,679.40                       | 0.52                  | 0.70                                                     |
| <b>Guinea</b>                           | 116.96                      | 10,434.55 | 10,551.51 | 122.03                     | 8,428.03  | 8,550.06  | 2,001.45                       | 0.73                  | 2.45                                                     |
| <b>Liberia</b>                          | 21.45                       | 4,081.57  | 4,103.02  | 21.67                      | 3,501.68  | 3,523.35  | 579.67                         | 0.57                  | 1.03                                                     |
| <b>Malawi</b>                           | 608.95                      | 15,428.66 | 16,037.61 | 624.58                     | 14,114.16 | 14,738.74 | 1,298.87                       | 0.90                  | 2.91                                                     |
| <b>Mali</b>                             | 122.94                      | 15,410.62 | 15,533.56 | 130.26                     | 11,877.86 | 12,008.11 | 3,525.45                       | 0.78                  | 1.76                                                     |
| <b>Mauritania</b>                       | 20.47                       | 3,798.48  | 3,818.95  | 22.76                      | 2,857.39  | 2,880.15  | 938.80                         | 0.74                  | 1.28                                                     |
| <b>Mozambique</b>                       | 1,795.55                    | 25,845.05 | 27,640.59 | 1,869.72                   | 22,021.97 | 23,891.69 | 3,748.91                       | 0.92                  | 2.63                                                     |

| Country                             | 2005 Guidelines (Thousands) |              |              | 2013 Guidelines(Thousands) |              |              | Total Cost Savings (Thousands) | 2013 Guidelines       |                                                          |
|-------------------------------------|-----------------------------|--------------|--------------|----------------------------|--------------|--------------|--------------------------------|-----------------------|----------------------------------------------------------|
|                                     | HIV+                        | HIV-         | Total        | HIV+                       | HIV-         | Total        |                                | Total cost per capita | Proportion of national healthcare expenditure per capita |
| <b>Nigeria</b>                      | 4,545.67                    | 163,610.14   | 168,155.80   | 5,200.30                   | 119,295.14   | 124,495.44   | 43,660.37                      | 0.72                  | 0.90                                                     |
| <b>Rwanda</b>                       | 71.63                       | 10,673.84    | 10,745.47    | 75.64                      | 9,691.49     | 9,767.13     | 978.34                         | 0.83                  | 1.32                                                     |
| <b>Sierra Leone</b>                 | 50.23                       | 5,062.17     | 5,112.40     | 51.46                      | 4,055.25     | 4,106.71     | 1,005.69                       | 0.67                  | 0.98                                                     |
| <b>Togo</b>                         | 125.19                      | 5,566.03     | 5,691.22     | 131.40                     | 4,579.61     | 4,711.01     | 980.21                         | 0.69                  | 1.54                                                     |
| <b>Uganda</b>                       | 950.05                      | 37,474.71    | 38,424.76    | 972.01                     | 32,586.46    | 33,558.48    | 4,866.29                       | 0.89                  | 2.11                                                     |
| <b>Zambia</b>                       | 786.80                      | 11,860.99    | 12,647.79    | 891.27                     | 9,584.90     | 10,476.17    | 2,171.62                       | 0.72                  | 0.83                                                     |
| <b>Angola</b>                       | 635.97                      | 24,583.14    | 25,219.12    | 856.57                     | 6,024.95     | 6,881.52     | 18,337.60                      | 0.32                  | 0.17                                                     |
| <b>Botswana</b>                     | 283.79                      | 2,246.15     | 2,529.95     | 402.54                     | 494.63       | 897.17       | 1,632.77                       | 0.42                  | 0.10                                                     |
| <b>Central African Republic</b>     | 574.13                      | 7,560.54     | 8,134.67     | 580.58                     | 7,584.76     | 8,165.34     | -30.66                         | 1.77                  | 9.67                                                     |
| <b>Chad</b>                         | 355.45                      | 5,570.50     | 5,925.95     | 385.29                     | 1,774.13     | 2,159.42     | 3,766.53                       | 0.17                  | 0.48                                                     |
| <b>Côte d'Ivoire</b>                | 669.09                      | 10,846.73    | 11,515.81    | 743.44                     | 4,487.67     | 5,231.11     | 6,284.71                       | 0.26                  | 0.32                                                     |
| <b>Djibouti</b>                     | 11.96                       | 325.79       | 337.75       | 13.64                      | 103.45       | 117.09       | 220.66                         | 0.13                  | 0.13                                                     |
| <b>Equatorial Guinea</b>            | 521.30                      | 4,561.92     | 5,083.22     | 782.84                     | 942.26       | 1,725.10     | 3,358.11                       | 2.15                  | 0.17                                                     |
| <b>Gabon</b>                        | 132.09                      | 2,732.22     | 2,864.31     | 190.23                     | 601.46       | 791.69       | 2,072.62                       | 0.46                  | 0.13                                                     |
| <b>Guinea-Bissau</b>                | 50.33                       | 464.76       | 515.09       | 53.06                      | 153.73       | 206.79       | 308.29                         | 0.12                  | 0.32                                                     |
| <b>Haiti</b>                        | 66.57                       | 1,965.85     | 2,032.42     | 70.79                      | 875.70       | 946.49       | 1,085.94                       | 0.09                  | 0.16                                                     |
| <b>Kenya</b>                        | 1,251.93                    | 13,210.48    | 14,462.41    | 1,337.33                   | 7,428.01     | 8,765.34     | 5,697.07                       | 0.20                  | 0.54                                                     |
| <b>Lesotho</b>                      | 203.37                      | 395.33       | 598.70       | 226.89                     | 115.39       | 342.27       | 256.43                         | 0.16                  | 0.11                                                     |
| <b>Sao Tome and Principe</b>        | 1.89                        | 66.22        | 68.12        | 2.10                       | 42.04        | 44.14        | 23.98                          | 0.23                  | 0.19                                                     |
| <b>South Africa</b>                 | 8,288.46                    | 43,342.47    | 51,630.93    | 11,658.89                  | 9,847.35     | 21,506.24    | 30,124.69                      | 0.38                  | 0.06                                                     |
| <b>Sudan</b>                        | 146.87                      | 36,283.41    | 36,430.28    | 163.14                     | 17,989.64    | 18,152.78    | 18,277.51                      | 0.48                  | 0.46                                                     |
| <b>Swaziland</b>                    | 187.34                      | 430.54       | 617.88       | 238.27                     | 129.71       | 367.98       | 249.90                         | 0.28                  | 0.11                                                     |
| <b>Tanzania, United Republic of</b> | 1,445.94                    | 15,843.48    | 17,289.42    | 1,494.17                   | 11,086.63    | 12,580.80    | 4,708.63                       | 0.25                  | 0.68                                                     |
| <b>Zimbabwe</b>                     | 864.96                      | 2,239.95     | 3,104.91     | 918.25                     | 945.63       | 1,863.88     | 1,241.04                       | 0.13                  | 0.34                                                     |
| <b>Total</b>                        | 30,358.51                   | 4,207,386.31 | 4,237,744.82 | 36,621.06                  | 2,971,370.34 | 3,007,991.41 | 1,229,753.42                   |                       |                                                          |



**Supplementary 16 table: Total DALYs averted and cost-effectiveness of implementing 2013 guidelines in a high cost less effective scenario**

| Country                                    | Total DALY averted in 2013 guidelines (Thousands) | Total DALY averted in 2005 guidelines (Thousands) | Cost per DALY averted in 2013 guidelines (US\$,2013) | Cost effectiveness comparing 2005 and 2013 guidelines (Cost per DALY saved, US\$, 2013) | Percentage of cost per DALY saved in GDP per capita (%) |
|--------------------------------------------|---------------------------------------------------|---------------------------------------------------|------------------------------------------------------|-----------------------------------------------------------------------------------------|---------------------------------------------------------|
| <b>Afghanistan</b>                         | 457.30                                            | 875.44                                            | 70.58                                                | 21.72                                                                                   | 3.51                                                    |
| <b>Azerbaijan</b>                          | 23.97                                             | 45.64                                             | 281.51                                               | 223.39                                                                                  | 3.02                                                    |
| <b>Bangladesh</b>                          | 483.36                                            | 910.09                                            | 242.76                                               | 57.69                                                                                   | 7.72                                                    |
| <b>China</b>                               | 930.73                                            | 1,752.85                                          | 774.11                                               | 249.16                                                                                  | 4.03                                                    |
| <b>Eritrea</b>                             | 51.49                                             | 98.98                                             | 103.89                                               | 35.43                                                                                   | 7.03                                                    |
| <b>Guatemala</b>                           | 69.42                                             | 132.69                                            | 118.26                                               | 26.96                                                                                   | 0.80                                                    |
| <b>India</b>                               | 4,488.62                                          | 8,522.64                                          | 217.52                                               | 121.97                                                                                  | 8.19                                                    |
| <b>Indonesia</b>                           | 599.09                                            | 1,137.93                                          | 220.28                                               | 56.29                                                                                   | 1.58                                                    |
| <b>Korea, Democratic People's Republic</b> | 43.07                                             | 82.09                                             | 249.83                                               | 103.55                                                                                  | 20.46                                                   |
| <b>Kyrgyzstan</b>                          | 13.25                                             | 24.97                                             | 287.54                                               | 83.10                                                                                   | 7.17                                                    |
| <b>Lao People's Democratic Republic</b>    | 64.96                                             | 124.61                                            | 74.67                                                | 27.82                                                                                   | 1.99                                                    |
| <b>Madagascar</b>                          | 193.75                                            | 370.93                                            | 86.90                                                | 22.64                                                                                   | 5.06                                                    |
| <b>Mexico</b>                              | 113.72                                            | 212.37                                            | 383.18                                               | 630.09                                                                                  | 6.46                                                    |
| <b>Myanmar</b>                             | 171.85                                            | 327.07                                            | 216.17                                               | 41.59                                                                                   | 3.64                                                    |
| <b>Nepal</b>                               | 86.92                                             | 165.78                                            | 270.76                                               | 34.58                                                                                   | 4.89                                                    |
| <b>Niger</b>                               | 330.60                                            | 635.69                                            | 50.91                                                | 13.41                                                                                   | 3.50                                                    |
| <b>Pakistan</b>                            | 1,670.98                                          | 3,212.46                                          | 81.51                                                | 24.80                                                                                   | 1.92                                                    |
| <b>Papua New Guinea</b>                    | 50.26                                             | 96.55                                             | 134.92                                               | 35.78                                                                                   | 1.64                                                    |
| <b>Peru</b>                                | 30.70                                             | 57.94                                             | 286.72                                               | 278.30                                                                                  | 4.24                                                    |
| <b>Philippines</b>                         | 314.84                                            | 595.98                                            | 189.49                                               | 103.01                                                                                  | 3.98                                                    |
| <b>Senegal</b>                             | 86.87                                             | 165.98                                            | 103.84                                               | 33.07                                                                                   | 3.21                                                    |
| <b>Somalia</b>                             | 247.51                                            | 476.59                                            | 32.16                                                | 10.99                                                                                   | 0.15                                                    |
| <b>Tajikistan</b>                          | 55.89                                             | 107.30                                            | 121.40                                               | 27.72                                                                                   | 4.55                                                    |
| <b>Turkmenistan</b>                        | 24.38                                             | 46.83                                             | 135.45                                               | 106.13                                                                                  | 1.63                                                    |
| <b>Uzbekistan</b>                          | 126.38                                            | 241.88                                            | 158.51                                               | 46.69                                                                                   | 2.72                                                    |
| <b>Yemen</b>                               | 159.17                                            | 303.25                                            | 129.50                                               | 67.28                                                                                   | 4.50                                                    |
| <b>Bolivia (Plurinational State of)</b>    | 42.56                                             | 81.97                                             | 15.34                                                | 35.90                                                                                   | 1.39                                                    |
| <b>Brazil</b>                              | 91.80                                             | 167.92                                            | 91.73                                                | 293.56                                                                                  | 2.59                                                    |
| <b>Cambodia</b>                            | 62.68                                             | 120.25                                            | 14.82                                                | 24.79                                                                                   | 2.62                                                    |
| <b>Comoros</b>                             | 6.80                                              | 13.03                                             | 83.27                                                | 20.67                                                                                   | 2.49                                                    |
| <b>Egypt</b>                               | 119.66                                            | 227.57                                            | 37.99                                                | 102.26                                                                                  | 3.21                                                    |
| <b>Iraq</b>                                | 139.24                                            | 265.05                                            | 114.52                                               | 122.37                                                                                  | 1.90                                                    |
| <b>Morocco</b>                             | 79.31                                             | 151.78                                            | 84.10                                                | 67.12                                                                                   | 2.31                                                    |
| <b>Solomon Islands</b>                     | 2.34                                              | 4.47                                              | 51.09                                                | 46.23                                                                                   | 3.05                                                    |

| Country                             | Total DALY averted in 2013 guidelines (Thousands) | Total DALY averted in 2005 guidelines (Thousands) | Cost per DALY averted in 2013 guidelines (US\$,2013) | Cost effectiveness comparing 2005 and 2013 guidelines (Cost per DALY saved, US\$, 2013) | Percentage of cost per DALY saved in GDP per capita (%) |
|-------------------------------------|---------------------------------------------------|---------------------------------------------------|------------------------------------------------------|-----------------------------------------------------------------------------------------|---------------------------------------------------------|
| <b>Viet Nam</b>                     | 115.43                                            | 214.59                                            | 70.37                                                | 118.08                                                                                  | 7.40                                                    |
| <b>Benin</b>                        | 99.76                                             | 191.87                                            | 61.65                                                | 19.54                                                                                   | 2.60                                                    |
| <b>Burkina Faso</b>                 | 204.23                                            | 390.63                                            | 69.90                                                | 27.79                                                                                   | 4.38                                                    |
| <b>Burundi</b>                      | 129.84                                            | 250.15                                            | 72.89                                                | 7.12                                                                                    | 2.84                                                    |
| <b>Cameroon</b>                     | 259.10                                            | 499.15                                            | 47.30                                                | 19.21                                                                                   | 1.67                                                    |
| <b>Congo</b>                        | 19.80                                             | 37.44                                             | 125.20                                               | 127.33                                                                                  | 4.04                                                    |
| <b>Congo, Democratic Republic</b>   | 204.74                                            | 1,770.31                                          | 234.16                                               | 6.90                                                                                    | 2.54                                                    |
| <b>Ethiopia</b>                     | 815.04                                            | 1,568.40                                          | 97.57                                                | 12.65                                                                                   | 2.69                                                    |
| <b>Gambia</b>                       | 15.50                                             | 29.69                                             | 61.40                                                | 23.55                                                                                   | 4.60                                                    |
| <b>Ghana</b>                        | 183.04                                            | 352.92                                            | 73.86                                                | 21.66                                                                                   | 1.35                                                    |
| <b>Guinea</b>                       | 116.81                                            | 224.05                                            | 73.20                                                | 18.66                                                                                   | 3.16                                                    |
| <b>Liberia</b>                      | 33.70                                             | 64.60                                             | 104.55                                               | 18.76                                                                                   | 4.45                                                    |
| <b>Malawi</b>                       | 112.32                                            | 215.99                                            | 131.22                                               | 12.53                                                                                   | 4.67                                                    |
| <b>Mali</b>                         | 267.58                                            | 515.92                                            | 44.88                                                | 14.20                                                                                   | 2.05                                                    |
| <b>Mauritania</b>                   | 42.13                                             | 80.87                                             | 68.36                                                | 24.23                                                                                   | 2.19                                                    |
| <b>Mozambique</b>                   | 221.78                                            | 423.41                                            | 107.73                                               | 18.59                                                                                   | 3.21                                                    |
| <b>Nigeria</b>                      | 2,335.38                                          | 4,499.06                                          | 53.31                                                | 20.18                                                                                   | 1.30                                                    |
| <b>Rwanda</b>                       | 90.65                                             | 174.96                                            | 107.74                                               | 11.60                                                                                   | 1.87                                                    |
| <b>Sierra Leone</b>                 | 95.41                                             | 184.08                                            | 43.04                                                | 11.34                                                                                   | 1.79                                                    |
| <b>Togo</b>                         | 60.93                                             | 117.10                                            | 77.32                                                | 17.45                                                                                   | 0.39                                                    |
| <b>Uganda</b>                       | 339.83                                            | 654.10                                            | 98.75                                                | 15.48                                                                                   | 2.83                                                    |
| <b>Zambia</b>                       | 161.14                                            | 311.04                                            | 65.01                                                | 14.49                                                                                   | 0.99                                                    |
| <b>Angola</b>                       | 502.54                                            | 971.25                                            | 13.52                                                | 39.31                                                                                   | 0.72                                                    |
| <b>Botswana</b>                     | 5.18                                              | 9.75                                              | 164.42                                               | 367.03                                                                                  | 5.10                                                    |
| <b>Central African Republic</b>     | 59.19                                             | 113.76                                            | 137.89                                               | -0.49                                                                                   | -0.10                                                   |
| <b>Chad</b>                         | 268.10                                            | 516.30                                            | 8.00                                                 | 15.23                                                                                   | 1.72                                                    |
| <b>Côte d'Ivoire</b>                | 204.74                                            | 391.80                                            | 25.39                                                | 33.77                                                                                   | 2.72                                                    |
| <b>Djibouti</b>                     | 5.75                                              | 11.01                                             | 20.22                                                | 42.12                                                                                   | 3.97                                                    |
| <b>Equatorial Guinea</b>            | 7.43                                              | 14.30                                             | 218.58                                               | 503.68                                                                                  | 2.10                                                    |
| <b>Gabon</b>                        | 8.57                                              | 16.33                                             | 89.78                                                | 269.99                                                                                  | 2.36                                                    |
| <b>Guinea-Bissau</b>                | 21.72                                             | 41.79                                             | 9.45                                                 | 15.43                                                                                   | 2.86                                                    |
| <b>Haiti</b>                        | 89.54                                             | 172.73                                            | 10.55                                                | 13.08                                                                                   | 1.70                                                    |
| <b>Kenya</b>                        | 424.58                                            | 817.99                                            | 20.55                                                | 14.59                                                                                   | 1.69                                                    |
| <b>Lesotho</b>                      | 13.00                                             | 24.95                                             | 25.52                                                | 22.34                                                                                   | 1.87                                                    |
| <b>Sao Tome and Principe</b>        | 1.28                                              | 2.46                                              | 34.45                                                | 20.42                                                                                   | 1.46                                                    |
| <b>South Africa</b>                 | 168.74                                            | 320.65                                            | 119.66                                               | 206.96                                                                                  | 13.10                                                   |
| <b>Sudan</b>                        | 405.41                                            | 772.94                                            | 44.76                                                | 49.75                                                                                   | 1.63                                                    |
| <b>Swaziland</b>                    | 8.28                                              | 15.91                                             | 42.00                                                | 35.38                                                                                   | 4.06                                                    |
| <b>Tanzania, United Republic of</b> | 333.09                                            | 634.76                                            | 37.69                                                | 15.70                                                                                   | 2.73                                                    |
| <b>Zimbabwe</b>                     | 123.57                                            | 238.01                                            | 14.86                                                | 11.08                                                                                   | 1.41                                                    |
| <b>Total</b>                        | 20,722.69                                         | 204.50                                            | 145.23                                               | 59.27                                                                                   |                                                         |
| <b>Median</b>                       | 112.32 (42.69                                     | 56.20 (34.69 –                                    | 83.27 (45.48 –                                       | 26.96                                                                                   |                                                         |

| Country | Total DALY averted in 2013 guidelines (Thousands) | Total DALY averted in 2005 guidelines (Thousands) | Cost per DALY averted in 2013 guidelines (US\$,2013) | Cost effectiveness comparing 2005 and 2013 guidelines (Cost per DALY saved, US\$, 2013) | Percentage of cost per DALY saved in GDP per capita (%) |
|---------|---------------------------------------------------|---------------------------------------------------|------------------------------------------------------|-----------------------------------------------------------------------------------------|---------------------------------------------------------|
| (IQR)   | -256.20)                                          | 120.61)                                           | 133.99)                                              | (16.14-67.24)                                                                           |                                                         |

## VI. Less effective scenario

### Less effective scenario assumptions:

1. Mortality reduction with 2005 and 2013 guidelines: 36%

All other assumptions are the same as the main model.

### Supplementary 17 table: Total DALYs averted and cost-effectiveness of implementing 2013 guidelines in a less effective scenario

| Country                             | Total DALY averted (Thousands) | Cost per DALY averted (Thousands) |        | Percentage of cost per DALY saved in GDP per capita (%) |       |
|-------------------------------------|--------------------------------|-----------------------------------|--------|---------------------------------------------------------|-------|
|                                     |                                | 2005                              | 2013   | 2005                                                    | 2013  |
| Afghanistan                         | 457.30                         | 74.66                             | 58.16  | 12.05                                                   | 9.39  |
| Azerbaijan                          | 23.97                          | 404.56                            | 206.97 | 5.47                                                    | 2.80  |
| Bangladesh                          | 483.36                         | 175.31                            | 130.38 | 23.46                                                   | 17.45 |
| China                               | 930.73                         | 630.15                            | 415.88 | 10.18                                                   | 6.72  |
| Eritrea                             | 51.49                          | 87.68                             | 56.94  | 17.39                                                   | 11.29 |
| Guatemala                           | 69.42                          | 84.52                             | 63.30  | 2.52                                                    | 1.89  |
| India                               | 4,488.62                       | 228.60                            | 123.83 | 15.35                                                   | 8.31  |
| Indonesia                           | 599.09                         | 167.91                            | 121.19 | 4.72                                                    | 3.41  |
| Korea, Democratic People's Republic | 43.07                          | 227.35                            | 137.43 | 44.93                                                   | 27.16 |
| Kyrgyzstan                          | 13.25                          | 222.63                            | 156.14 | 19.20                                                   | 13.46 |
| Lao People's Democratic Republic    | 64.96                          | 64.52                             | 41.15  | 4.61                                                    | 2.94  |
| Madagascar                          | 193.75                         | 66.78                             | 49.03  | 14.93                                                   | 10.96 |
| Mexico                              | 113.72                         | 806.02                            | 266.83 | 8.27                                                    | 2.74  |
| Myanmar                             | 171.85                         | 148.94                            | 115.10 | 13.02                                                   | 10.06 |
| Nepal                               | 86.92                          | 172.48                            | 145.25 | 24.41                                                   | 20.55 |
| Niger                               | 330.60                         | 43.51                             | 33.17  | 11.36                                                   | 8.66  |
| Pakistan                            | 1,670.98                       | 71.93                             | 51.27  | 5.57                                                    | 3.97  |
| Papua New Guinea                    | 50.26                          | 105.24                            | 74.64  | 4.82                                                    | 3.42  |
| Peru                                | 30.70                          | 416.38                            | 175.18 | 6.34                                                    | 2.67  |
| Philippines                         | 314.84                         | 200.01                            | 113.27 | 7.73                                                    | 4.38  |

| Country                                             | Total DALY averted<br>(Thousands) | Cost per DALY averted<br>(Thousands) |        | Percentage of cost per DALY saved in GDP per capita (%) |       |
|-----------------------------------------------------|-----------------------------------|--------------------------------------|--------|---------------------------------------------------------|-------|
|                                                     |                                   | 2005                                 | 2013   | 2005                                                    | 2013  |
| <b>Senegal</b>                                      | 86.87                             | 86.29                                | 59.12  | 8.36                                                    | 5.73  |
| <b>Somalia</b>                                      | 247.51                            | 28.85                                | 20.42  | 0.38                                                    | 0.27  |
| <b>Tajikistan</b>                                   | 55.89                             | 98.13                                | 75.54  | 16.12                                                   | 12.41 |
| <b>Turkmenistan</b>                                 | 24.38                             | 176.60                               | 81.70  | 2.71                                                    | 1.25  |
| <b>Uzbekistan</b>                                   | 126.38                            | 128.61                               | 89.13  | 7.49                                                    | 5.19  |
| <b>Yemen</b>                                        | 159.17                            | 141.21                               | 85.13  | 9.45                                                    | 5.70  |
| <b>Bolivia<br/>(Plurinational<br/>State of)</b>     | 42.56                             | 45.87                                | 14.44  | 1.78                                                    | 0.56  |
| <b>Brazil</b>                                       | 91.80                             | 317.81                               | 85.99  | 2.80                                                    | 0.76  |
| <b>Cambodia</b>                                     | 62.68                             | 33.86                                | 13.53  | 3.58                                                    | 1.43  |
| <b>Comoros</b>                                      | 6.80                              | 97.28                                | 81.65  | 11.71                                                   | 9.83  |
| <b>Egypt</b>                                        | 119.66                            | 123.68                               | 35.84  | 3.88                                                    | 1.12  |
| <b>Iraq</b>                                         | 139.24                            | 218.14                               | 112.12 | 3.38                                                    | 1.74  |
| <b>Morocco</b>                                      | 79.31                             | 140.76                               | 82.55  | 4.85                                                    | 2.84  |
| <b>Solomon Islands</b>                              | 2.34                              | 87.64                                | 49.25  | 5.77                                                    | 3.24  |
| <b>Viet Nam</b>                                     | 115.43                            | 159.00                               | 66.08  | 9.96                                                    | 4.14  |
| <b>Benin</b>                                        | 99.76                             | 49.35                                | 33.32  | 6.56                                                    | 4.43  |
| <b>Burkina Faso</b>                                 | 204.23                            | 63.14                                | 41.13  | 9.95                                                    | 6.48  |
| <b>Burundi</b>                                      | 129.84                            | 48.00                                | 42.65  | 19.13                                                   | 16.99 |
| <b>Cameroon</b>                                     | 259.10                            | 42.82                                | 26.56  | 3.72                                                    | 2.31  |
| <b>Congo<br/>Congo,<br/>Democratic<br/>Republic</b> | 19.80                             | 192.49                               | 83.78  | 6.10                                                    | 2.66  |
| <b>Ethiopia</b>                                     | 204.74                            | 172.60                               | 128.54 | 63.46                                                   | 47.26 |
| <b>Gambia</b>                                       | 815.04                            | 60.74                                | 50.77  | 12.92                                                   | 10.80 |
| <b>Ghana</b>                                        | 15.50                             | 55.47                                | 36.61  | 10.83                                                   | 7.15  |
| <b>Guinea</b>                                       | 183.04                            | 58.94                                | 40.47  | 3.67                                                    | 2.52  |
| <b>Liberia</b>                                      | 116.81                            | 57.75                                | 43.06  | 9.77                                                    | 7.29  |
| <b>Malawi</b>                                       | 33.70                             | 73.70                                | 59.37  | 17.48                                                   | 14.08 |
| <b>Mali</b>                                         | 112.32                            | 83.85                                | 74.15  | 31.28                                                   | 27.66 |
| <b>Mauritania</b>                                   | 267.58                            | 40.16                                | 28.76  | 5.79                                                    | 4.14  |
| <b>Mozambique</b>                                   | 42.13                             | 65.48                                | 45.53  | 5.92                                                    | 4.12  |
| <b>Nigeria</b>                                      | 221.78                            | 92.83                                | 78.82  | 16.04                                                   | 13.62 |
| <b>Rwanda</b>                                       | 2,335.38                          | 54.80                                | 37.76  | 3.52                                                    | 2.43  |
| <b>Sierra Leone</b>                                 | 90.65                             | 67.45                                | 58.12  | 10.88                                                   | 9.38  |
| <b>Togo</b>                                         | 95.41                             | 33.34                                | 24.40  | 5.25                                                    | 3.84  |
| <b>Uganda</b>                                       | 60.93                             | 58.07                                | 44.19  | 1.29                                                    | 0.98  |
| <b>Zambia</b>                                       | 339.83                            | 66.08                                | 53.80  | 12.08                                                   | 9.84  |
| <b>Angola</b>                                       | 161.14                            | 50.70                                | 38.50  | 3.45                                                    | 2.62  |
| <b>Botswana</b>                                     | 502.54                            | 48.54                                | 12.91  | 0.88                                                    | 0.24  |
| <b>Central African<br/>Republic</b>                 | 5.18                              | 478.19                               | 159.13 | 6.65                                                    | 2.21  |
| <b>Chad</b>                                         | 59.19                             | 133.60                               | 136.21 | 28.26                                                   | 28.82 |
| <b>Côte d'Ivoire</b>                                | 268.10                            | 19.47                                | 6.97   | 2.20                                                    | 0.79  |
| <b>Djibouti</b>                                     | 204.74                            | 51.18                                | 23.37  | 4.11                                                    | 1.88  |
| <b>Equatorial<br/>Guinea</b>                        | 5.75                              | 53.39                                | 18.25  | 5.03                                                    | 1.72  |
| <b>Gabon</b>                                        | 7.43                              | 680.42                               | 216.78 | 2.83                                                    | 0.90  |
| <b>Guinea-Bissau</b>                                | 8.57                              | 329.20                               | 87.69  | 2.88                                                    | 0.77  |
| <b>Haiti</b>                                        | 21.72                             | 20.49                                | 8.07   | 3.80                                                    | 1.50  |
|                                                     | 89.54                             | 20.29                                | 9.66   | 2.63                                                    | 1.25  |

| Country                      | Total DALY averted (Thousands) | Cost per DALY averted (Thousands) |                     | Percentage of cost per DALY saved in GDP per capita (%) |      |
|------------------------------|--------------------------------|-----------------------------------|---------------------|---------------------------------------------------------|------|
|                              |                                | 2005                              | 2013                | 2005                                                    | 2013 |
| Kenya                        | 424.58                         | 31.10                             | 19.27               | 3.60                                                    | 2.23 |
| Lesotho                      | 13.00                          | 40.20                             | 21.71               | 3.37                                                    | 1.82 |
| Sao Tome and Principe        | 1.28                           | 50.44                             | 33.41               | 3.60                                                    | 2.38 |
| South Africa                 | 168.74                         | 298.27                            | 115.40              | 18.88                                                   | 7.30 |
| Sudan                        | 405.41                         | 83.26                             | 42.55               | 2.74                                                    | 1.40 |
| Swaziland                    | 8.28                           | 70.13                             | 38.98               | 8.04                                                    | 4.47 |
| Tanzania, United Republic of | 333.09                         | 47.81                             | 35.92               | 8.33                                                    | 6.26 |
| Zimbabwe                     | 123.57                         | 21.90                             | 12.93               | 2.78                                                    | 1.64 |
| <b>Total</b>                 | 20,722.69                      | 141.85                            | 85.83               | 12.05                                                   | 9.39 |
| <b>Median (IQR)</b>          | 112.32<br>(42.69-256.20)       | 74.66(50.51-171.34)               | 53.80 (35.86-88.77) |                                                         |      |

## VII. Not cost-effective scenario

### High cost less effective scenario assumptions:

- CCM Coverage: 100% coverage of rural population in countries with CCM
- Unit cost of medicine changed based on review by Zhang et al 2015 (in press)
- Mortality reduction with 2013 guidelines: 9%, 2005 guidelines remain 70%.

All other assumptions are the same as the main model.

**Supplementary 18 table: Total DALYs averted and cost-effectiveness of implementing 2013 guidelines in not cost-effective scenario**

| Country                    | Total DALY averted in 2013 guidelines (Thousands) | Total DALY averted in 2005 guidelines (Thousands) | Cost per DALY averted in 2013 guidelines (US\$, 2013) | Percentage of cost per DALY saved in 2013 in GDP per capita (%) | Cost effectiveness ratio comparing 2005 and 2013 guidelines (Cost per DALY saved, US\$, 2013) | Percentage of Cost-effectiveness ratio comparing 2005 and 2013 in GDP per capita (%) |
|----------------------------|---------------------------------------------------|---------------------------------------------------|-------------------------------------------------------|-----------------------------------------------------------------|-----------------------------------------------------------------------------------------------|--------------------------------------------------------------------------------------|
| Afghanistan                | 125.25                                            | 875.44                                            | 257.70                                                | 41.59                                                           | 12.11                                                                                         | 1.95                                                                                 |
| Azerbaijan                 | 6.75                                              | 45.64                                             | 998.83                                                | 13.51                                                           | 124.51                                                                                        | 1.68                                                                                 |
| Bangladesh                 | 144.49                                            | 910.09                                            | 812.11                                                | 108.67                                                          | 32.16                                                                                         | 4.30                                                                                 |
| China                      | 277.87                                            | 1,752.85                                          | 2592.86                                               | 41.90                                                           | 138.88                                                                                        | 2.24                                                                                 |
| Eritrea                    | 13.78                                             | 98.98                                             | 388.33                                                | 77.00                                                           | 19.75                                                                                         | 3.92                                                                                 |
| Guatemala                  | 19.18                                             | 132.69                                            | 428.07                                                | 12.77                                                           | 15.03                                                                                         | 0.45                                                                                 |
| India                      | 1,285.13                                          | 8,522.64                                          | 759.73                                                | 51.01                                                           | 67.98                                                                                         | 4.56                                                                                 |
| Indonesia                  | 171.19                                            | 1,137.93                                          | 770.89                                                | 21.67                                                           | 31.38                                                                                         | 0.88                                                                                 |
| Korea, Democratic People's | 12.09                                             | 82.09                                             | 890.20                                                | 175.93                                                          | 57.72                                                                                         | 11.41                                                                                |

| Country                                 | Total DALY averted in 2013 guidelines (Thousands) | Total DALY averted in 2005 guidelines (Thousands) | Cost per DALY averted in 2013 guidelines (US\$, 2013) | Percentage of cost per DALY saved in 2013 in GDP per capita (%) | Cost effectiveness ratio comparing 2005 and 2013 guidelines (Cost per DALY saved, US\$, 2013) | Percentage of Cost-effectiveness ratio comparing 2005 and 2013 in GDP per capita (%) |
|-----------------------------------------|---------------------------------------------------|---------------------------------------------------|-------------------------------------------------------|-----------------------------------------------------------------|-----------------------------------------------------------------------------------------------|--------------------------------------------------------------------------------------|
| <b>Republic Kyrgyzstan</b>              | 3.95                                              | 24.97                                             | 965.38                                                | 83.25                                                           | 46.32                                                                                         | 3.99                                                                                 |
| <b>Lao People's Democratic Republic</b> | 17.60                                             | 124.61                                            | 275.58                                                | 19.70                                                           | 15.50                                                                                         | 1.11                                                                                 |
| <b>Madagascar</b>                       | 53.04                                             | 370.93                                            | 317.41                                                | 70.94                                                           | 12.62                                                                                         | 2.82                                                                                 |
| <b>Mexico</b>                           | 35.37                                             | 212.37                                            | 1231.86                                               | 12.64                                                           | 351.20                                                                                        | 3.60                                                                                 |
| <b>Myanmar</b>                          | 48.59                                             | 327.07                                            | 764.58                                                | 66.83                                                           | 23.18                                                                                         | 2.03                                                                                 |
| <b>Nepal</b>                            | 24.30                                             | 165.78                                            | 968.61                                                | 137.07                                                          | 19.28                                                                                         | 2.73                                                                                 |
| <b>Niger</b>                            | 88.31                                             | 635.69                                            | 190.57                                                | 49.78                                                           | 7.48                                                                                          | 1.95                                                                                 |
| <b>Pakistan</b>                         | 446.87                                            | 3,212.46                                          | 304.78                                                | 23.62                                                           | 13.83                                                                                         | 1.07                                                                                 |
| <b>Papua New Guinea</b>                 | 13.50                                             | 96.55                                             | 502.19                                                | 22.99                                                           | 19.95                                                                                         | 0.91                                                                                 |
| <b>Peru</b>                             | 9.07                                              | 57.94                                             | 970.67                                                | 14.78                                                           | 155.12                                                                                        | 2.36                                                                                 |
| <b>Philippines</b>                      | 91.58                                             | 595.98                                            | 651.44                                                | 25.18                                                           | 57.42                                                                                         | 2.22                                                                                 |
| <b>Senegal</b>                          | 24.05                                             | 165.98                                            | 375.09                                                | 36.36                                                           | 18.43                                                                                         | 1.79                                                                                 |
| <b>Somalia</b>                          | 65.60                                             | 476.59                                            | 121.36                                                | 1.62                                                            | 6.13                                                                                          | 0.08                                                                                 |
| <b>Tajikistan</b>                       | 15.07                                             | 107.30                                            | 450.21                                                | 73.94                                                           | 15.45                                                                                         | 2.54                                                                                 |
| <b>Turkmenistan</b>                     | 6.55                                              | 46.83                                             | 504.43                                                | 7.75                                                            | 59.16                                                                                         | 0.91                                                                                 |
| <b>Uzbekistan</b>                       | 34.65                                             | 241.88                                            | 578.05                                                | 33.68                                                           | 26.02                                                                                         | 1.52                                                                                 |
| <b>Yemen</b>                            | 44.75                                             | 303.25                                            | 460.59                                                | 30.82                                                           | 37.50                                                                                         | 2.51                                                                                 |
| <b>Bolivia (Plurinational State of)</b> | 11.26                                             | 81.97                                             | 57.99                                                 | 2.25                                                            | 20.01                                                                                         | 0.78                                                                                 |
| <b>Brazil</b>                           | 31.34                                             | 167.92                                            | 268.66                                                | 2.37                                                            | 163.63                                                                                        | 1.44                                                                                 |
| <b>Cambodia</b>                         | 16.96                                             | 120.25                                            | 54.75                                                 | 5.79                                                            | 13.82                                                                                         | 1.46                                                                                 |
| <b>Comoros</b>                          | 1.86                                              | 13.03                                             | 304.42                                                | 36.65                                                           | 11.52                                                                                         | 1.39                                                                                 |
| <b>Egypt</b>                            | 33.98                                             | 227.57                                            | 133.79                                                | 4.20                                                            | 57.00                                                                                         | 1.79                                                                                 |
| <b>Iraq</b>                             | 39.33                                             | 265.05                                            | 405.45                                                | 6.28                                                            | 68.20                                                                                         | 1.06                                                                                 |
| <b>Morocco</b>                          | 21.75                                             | 151.78                                            | 306.63                                                | 10.57                                                           | 37.41                                                                                         | 1.29                                                                                 |
| <b>Solomon Islands</b>                  | 0.65                                              | 4.47                                              | 183.48                                                | 12.09                                                           | 25.77                                                                                         | 1.70                                                                                 |
| <b>Viet Nam</b>                         | 36.68                                             | 214.59                                            | 221.43                                                | 13.88                                                           | 65.82                                                                                         | 4.12                                                                                 |
| <b>Benin</b>                            | 26.61                                             | 191.87                                            | 231.12                                                | 30.74                                                           | 10.89                                                                                         | 1.45                                                                                 |
| <b>Burkina Faso</b>                     | 56.20                                             | 390.63                                            | 254.01                                                | 40.04                                                           | 15.49                                                                                         | 2.44                                                                                 |
| <b>Burundi</b>                          | 34.29                                             | 250.15                                            | 275.97                                                | 109.96                                                          | 3.97                                                                                          | 1.58                                                                                 |
| <b>Cameroon</b>                         | 68.47                                             | 499.15                                            | 178.99                                                | 15.55                                                           | 10.71                                                                                         | 0.93                                                                                 |
| <b>Congo, Democratic Republic</b>       | 56.20                                             | 1,770.31                                          | 853.09                                                | <b>313.67</b>                                                   | 6.30                                                                                          | 2.32                                                                                 |
| <b>Ethiopia</b>                         | 216.79                                            | 1,568.40                                          | 366.83                                                | 78.01                                                           | 7.05                                                                                          | 1.50                                                                                 |
| <b>Gambia</b>                           | 4.23                                              | 29.69                                             | 224.89                                                | 43.92                                                           | 13.12                                                                                         | 2.56                                                                                 |
| <b>Ghana</b>                            | 48.14                                             | 352.92                                            | 280.84                                                | 17.50                                                           | 12.07                                                                                         | 0.75                                                                                 |
| <b>Guinea</b>                           | 31.65                                             | 224.05                                            | 270.16                                                | 45.71                                                           | 10.40                                                                                         | 1.76                                                                                 |
| <b>Liberia</b>                          | 9.16                                              | 64.60                                             | 384.51                                                | 91.18                                                           | 10.46                                                                                         | 2.48                                                                                 |
| <b>Malawi</b>                           | 30.00                                             | 215.99                                            | 491.33                                                | 183.29                                                          | 6.98                                                                                          | 2.61                                                                                 |

| Country                             | Total DALY averted in 2013 guidelines (Thousands) | Total DALY averted in 2005 guidelines (Thousands) | Cost per DALY averted in 2013 guidelines (US\$, 2013) | Percentage of cost per DALY saved in 2013 in GDP per capita (%) | Cost effectiveness ratio comparing 2005 and 2013 guidelines (Cost per DALY saved, US\$, 2013) | Percentage of Cost-effectiveness ratio comparing 2005 and 2013 in GDP per capita (%) |
|-------------------------------------|---------------------------------------------------|---------------------------------------------------|-------------------------------------------------------|-----------------------------------------------------------------|-----------------------------------------------------------------------------------------------|--------------------------------------------------------------------------------------|
| Mali                                | 70.36                                             | 515.92                                            | 170.66                                                | 24.59                                                           | 7.91                                                                                          | 1.14                                                                                 |
| Mauritania                          | 11.37                                             | 80.87                                             | 253.28                                                | 22.90                                                           | 13.51                                                                                         | 1.22                                                                                 |
| Mozambique                          | 61.65                                             | 423.41                                            | 387.51                                                | 66.95                                                           | 10.36                                                                                         | 1.79                                                                                 |
| Nigeria                             | 617.17                                            | 4,499.06                                          | 201.72                                                | 12.97                                                           | 11.25                                                                                         | 0.72                                                                                 |
| Rwanda                              | 23.70                                             | 174.96                                            | 412.09                                                | 66.47                                                           | 6.47                                                                                          | 1.04                                                                                 |
| Sierra Leone                        | 24.99                                             | 184.08                                            | 164.31                                                | 25.88                                                           | 6.32                                                                                          | 1.00                                                                                 |
| Togo                                | 16.31                                             | 117.10                                            | 288.78                                                | 6.43                                                            | 9.73                                                                                          | 0.22                                                                                 |
| Uganda                              | 90.26                                             | 654.10                                            | 371.78                                                | 67.97                                                           | 8.63                                                                                          | 1.58                                                                                 |
| Zambia                              | 42.10                                             | 311.04                                            | 248.82                                                | 16.94                                                           | 8.07                                                                                          | 0.55                                                                                 |
| Angola                              | 130.32                                            | 971.25                                            | 52.14                                                 | 0.95                                                            | 21.91                                                                                         | 0.40                                                                                 |
| Botswana                            | 1.54                                              | 9.75                                              | 551.60                                                | 7.67                                                            | 204.58                                                                                        | 2.84                                                                                 |
| <b>Central African Republic</b>     | 15.86                                             | 113.76                                            | 514.68                                                | 108.89                                                          | -0.27                                                                                         | -0.06                                                                                |
| Chad                                | 70.99                                             | 516.30                                            | 30.22                                                 | 3.41                                                            | 8.49                                                                                          | 0.96                                                                                 |
| Côte d'Ivoire                       | 56.20                                             | 391.80                                            | 92.49                                                 | 7.44                                                            | 18.83                                                                                         | 1.51                                                                                 |
| Djibouti                            | 1.58                                              | 11.01                                             | 73.65                                                 | 6.94                                                            | 23.47                                                                                         | 2.21                                                                                 |
| <b>Equatorial Guinea</b>            | 1.98                                              | 14.30                                             | 821.44                                                | 3.42                                                            | 280.74                                                                                        | 1.17                                                                                 |
| Gabon                               | 2.40                                              | 16.33                                             | 319.89                                                | 2.80                                                            | 150.49                                                                                        | 1.32                                                                                 |
| Guinea-Bissau                       | 5.78                                              | 41.79                                             | 35.50                                                 | 6.58                                                            | 8.60                                                                                          | 1.59                                                                                 |
| Haiti                               | 23.48                                             | 172.73                                            | 40.21                                                 | 5.22                                                            | 7.29                                                                                          | 0.95                                                                                 |
| Kenya                               | 112.17                                            | 817.99                                            | 77.78                                                 | 8.99                                                            | 8.13                                                                                          | 0.94                                                                                 |
| Lesotho                             | 3.51                                              | 24.95                                             | 94.57                                                 | 7.93                                                            | 12.45                                                                                         | 1.04                                                                                 |
| <b>Sao Tome and Principe</b>        | 0.34                                              | 2.46                                              | 128.59                                                | 9.17                                                            | 11.38                                                                                         | 0.81                                                                                 |
| South Africa                        | 48.10                                             | 320.65                                            | 419.76                                                | 26.57                                                           | 115.35                                                                                        | 7.30                                                                                 |
| Sudan                               | 113.54                                            | 772.94                                            | 159.81                                                | 5.25                                                            | 27.73                                                                                         | 0.91                                                                                 |
| Swaziland                           | 2.21                                              | 15.91                                             | 157.30                                                | 18.03                                                           | 19.72                                                                                         | 2.26                                                                                 |
| <b>Tanzania, United Republic of</b> | 93.54                                             | 634.76                                            | 134.21                                                | 23.38                                                           | 8.75                                                                                          | 1.52                                                                                 |
| Zimbabwe                            | 32.69                                             | 238.01                                            | 56.18                                                 | 7.13                                                            | 6.18                                                                                          | 0.78                                                                                 |
| <b>Total</b>                        | 11,431.00                                         | 204.50                                            | 263.27                                                | 41.59                                                           | 107.45                                                                                        |                                                                                      |
| <b>Median (IQR)</b>                 | 31.34 (11.55 -64.61)                              | 56.20 (34.69 - 120.61)                            | 304.42 (172.74 - 499.48)                              |                                                                 | 15.45(9.88-37.48)                                                                             |                                                                                      |

Supplementary 19 table: Years of Life Saved and deaths averted in each country by implementing 2013 guidelines

| Country | Number of deaths averted | Years of Life Saved (Years) |
|---------|--------------------------|-----------------------------|
|---------|--------------------------|-----------------------------|

| Country                      | Number of deaths averted | Years of Life Saved (Years) |
|------------------------------|--------------------------|-----------------------------|
| Afghanistan                  | 14,065.1                 | 860,870.2                   |
| Angola                       | 18,503.8                 | 965,004.0                   |
| Azerbaijan                   | 629.3                    | 44,624.6                    |
| Bangladesh                   | 12,378.8                 | 878,558.1                   |
| Benin                        | 3,179.4                  | 189,644.0                   |
| Bolivia                      | 1,201.2                  | 81,147.9                    |
| Botswana                     | 197.4                    | 9,418.2                     |
| Brazil                       | 2,111.2                  | 156,735.0                   |
| Burkina Faso                 | 6,786.5                  | 383,766.7                   |
| Burundi                      | 4,552.8                  | 247,700.2                   |
| Cambodia                     | 1,647.8                  | 118,524.1                   |
| Cameroon                     | 8,929.9                  | 494,226.7                   |
| Central African Republic     | 2,228.8                  | 112,342.2                   |
| Chad                         | 9,933.0                  | 511,019.4                   |
| China                        | 22,367.8                 | 1,692,596.7                 |
| Comoros                      | 209.3                    | 12,815.8                    |
| Congo                        | 614.6                    | 36,324.7                    |
| Dem. Rep. of the Congo       | 34,817.3                 | 1,752,467.8                 |
| Côte d'Ivoire                | 7,546.0                  | 385,116.8                   |
| Djibouti                     | 174.3                    | 10,822.6                    |
| Egypt                        | 3,106.6                  | 222,153.1                   |
| Equatorial Guinea            | 264.6                    | 14,138.9                    |
| Eritrea                      | 1,552.6                  | 97,777.8                    |
| Ethiopia                     | 24,313.8                 | 1,551,032.8                 |
| Gabon                        | 250.6                    | 15,976.7                    |
| Gambia                       | 493.5                    | 29,218.0                    |
| Ghana                        | 5,693.1                  | 349,750.9                   |
| Guatemala                    | 1,800.4                  | 130,257.2                   |
| Guinea                       | 3,915.8                  | 220,789.8                   |
| Guinea-Bissau                | 756.0                    | 41,323.6                    |
| Haiti                        | 2,701.3                  | 171,264.2                   |
| India                        | 124,437.6                | 8,305,330.8                 |
| Indonesia                    | 15,588.3                 | 1,109,376.8                 |
| Iraq                         | 3,703.7                  | 259,019.7                   |
| Kenya                        | 13,056.4                 | 809,952.7                   |
| Dem. Peoples's Rep. of Korea | 1,144.5                  | 80,329.8                    |
| Kyrgyzstan                   | 354.9                    | 24,123.3                    |
| Lao People's Dem. Republic   | 1,792.7                  | 122,790.4                   |
| Lesotho                      | 493.5                    | 24,607.4                    |
| Liberia                      | 1,047.9                  | 63,612.2                    |
| Madagascar                   | 5,614.7                  | 364,793.5                   |
| Malawi                       | 3,845.8                  | 213,434.1                   |
| Mali                         | 9,250.5                  | 511,294.9                   |
| Mauritania                   | 1,288.0                  | 79,755.0                    |
| Mexico                       | 2,613.8                  | 203,115.4                   |
| Morocco                      | 2,094.4                  | 149,216.4                   |
| Mozambique                   | 8,202.6                  | 415,132.1                   |
| Myanmar                      | 4,878.3                  | 319,571.7                   |
| Nepal                        | 2,364.6                  | 162,357.7                   |
| Niger                        | 10,710.7                 | 628,135.7                   |
| Nigeria                      | 84,436.1                 | 4,454,629.1                 |
| Pakistan                     | 47,395.6                 | 3,173,625.6                 |
| Papua New Guinea             | 1,518.3                  | 95,295.4                    |
| Peru                         | 746.2                    | 56,080.2                    |



| <b>Country</b>                     | <b>Number of deaths averted</b> | <b>Years of Life Saved (Years)</b> |
|------------------------------------|---------------------------------|------------------------------------|
| <b>Philippines</b>                 | 8,374.8                         | 578,819.4                          |
| <b>Rwanda</b>                      | 2,709.7                         | 173,580.6                          |
| <b>Sao Tome and Principe</b>       | 36.4                            | 2,426.6                            |
| <b>Senegal</b>                     | 2,557.8                         | 162,869.1                          |
| <b>Sierra Leone</b>                | 3,985.1                         | 182,558.4                          |
| <b>Solomon Islands</b>             | 64.4                            | 4,381.7                            |
| <b>Somalia</b>                     | 8,519.7                         | 471,631.5                          |
| <b>South Africa</b>                | 5,445.3                         | 312,757.2                          |
| <b>Sudan</b>                       | 12,126.1                        | 756,689.6                          |
| <b>Swaziland</b>                   | 317.1                           | 15,726.3                           |
| <b>Tajikistan</b>                  | 1,562.4                         | 105,836.0                          |
| <b>United Republic of Tanzania</b> | 10,047.8                        | 621,073.3                          |
| <b>Togo</b>                        | 2,034.2                         | 115,661.8                          |
| <b>Turkmenistan</b>                | 701.4                           | 46,228.9                           |
| <b>Uganda</b>                      | 10,874.5                        | 647,026.4                          |
| <b>Uzbekistan</b>                  | 3,462.9                         | 237,798.7                          |
| <b>Viet Nam</b>                    | 2,684.5                         | 204,153.3                          |
| <b>Yemen</b>                       | 4,673.2                         | 296,641.3                          |
| <b>Zambia</b>                      | 5,306.7                         | 308,620.2                          |
| <b>Zimbabwe</b>                    | 3,911.6                         | 235,614.4                          |
| <b>Total</b>                       | <b>632,897.3</b>                | <b>38,893,083.7</b>                |

**Supplementary Box 1 Key changes in the classification of pneumonia and recommended treatment in the 2005 guideline and 2013 guideline**

| 2005 Guidelines |                             |                 |                                                                                                                               | 2013 Guidelines             |                 |                                                                                                                             |
|-----------------|-----------------------------|-----------------|-------------------------------------------------------------------------------------------------------------------------------|-----------------------------|-----------------|-----------------------------------------------------------------------------------------------------------------------------|
| Patient Group   | Classification of Pneumonia | Major Symptoms  | Recommended Treatment                                                                                                         | Classification of Pneumonia | Major Symptoms  | Recommended Treatment                                                                                                       |
| <b>HIV-</b>     | Pneumonia                   | Fast breathing  | 5 days treatment at community or first level health facility with co-trimoxazole (non-dispersible tablet at recommended dose) | Pneumonia                   | Fast breathing  | 5 days treatment at community or first level health facility with oral amoxicillin (dispersible tablet at recommended dose) |
|                 | Severe pneumonia            | Chest indrawing | Admit to hospital                                                                                                             |                             | Chest indrawing | 5 days treatment at first level health facility                                                                             |
|                 | Very severe pneumonia       | Danger signs    | Admit to hospital                                                                                                             | Severe pneumonia            | Danger signs    | Admit to hospital                                                                                                           |
| <b>HIV+</b>     | Pneumonia                   | Fast breathing  | 5 days treatment at community or first level health facility with co-trimoxazole (non-dispersible                             | Pneumonia                   | Fast breathing  | 5 days treatment at community or first level health facility with oral amoxicillin (dispersible                             |

|                          |                    |                                   |                     |                    |                                   |
|--------------------------|--------------------|-----------------------------------|---------------------|--------------------|-----------------------------------|
|                          |                    | tablet at<br>recommended<br>dose) |                     |                    | tablet at<br>recommended<br>dose) |
| Severe<br>pneumonia      | Chest<br>indrawing | Admit to hospital                 |                     | Chest<br>indrawing | Admit to hospital                 |
| Very severe<br>pneumonia | Danger<br>signs    | Admit to hospital                 | Severe<br>pneumonia | Danger<br>signs    | Admit to hospital                 |

### Supplementary Box 2 Description of scenarios

| Scenarios                 | New Assumptions                                                                                                                                                                                                                                                                                                                                                                                                                                                                                                                                                                                                                                                                                                                                                                                                                                                                                                                                                                                                                                                                                                                                                                                                                                                                      |
|---------------------------|--------------------------------------------------------------------------------------------------------------------------------------------------------------------------------------------------------------------------------------------------------------------------------------------------------------------------------------------------------------------------------------------------------------------------------------------------------------------------------------------------------------------------------------------------------------------------------------------------------------------------------------------------------------------------------------------------------------------------------------------------------------------------------------------------------------------------------------------------------------------------------------------------------------------------------------------------------------------------------------------------------------------------------------------------------------------------------------------------------------------------------------------------------------------------------------------------------------------------------------------------------------------------------------|
| Baseline scenario         | <ol style="list-style-type: none"> <li>1. Universal coverage: 100% patients get treatment at community, fist level facility or hospital.</li> <li>2. CCM Coverage: 50% rural population would be treated by CHWs and the remaining 50% would be treated at a health facility. [15,29]</li> <li>3. The proportion of pneumonia signs (i.e. fast breathing, lower chest wall indrawing and danger signs) are the same in HIV-infected and uninfected children with pneumonia – 85% of children with pneumonia have fast breathing, 13% have chest wall indrawing and about 2% have danger signs – based on the results of studies carried out at the community level. [15,22,23]</li> <li>4. The number of CHWs needed per country: one CHW per 1000 rural population.[29]</li> <li>5. Deaths averted by pneumonia treatment were calculated based on the reported estimates of 70% child mortality reduction from universal coverage of community management of childhood pneumonia [34]</li> <li>6. Unit cost of medicine : We used median supplier prices from Management Sciences for Health (MSH) International Price Indicator (2012)[30], UNICEF supply division data, and UNICEF report for cost of medicines[31] for the list of drugs based on the WHO guidelines</li> </ol> |
| High cost scenario        | <ol style="list-style-type: none"> <li>1. CCM Coverage: 100% coverage of rural population in countries with CCM</li> <li>2. Unit cost of medicine changed based on review by Zhang et al 2016 [19]</li> </ol>                                                                                                                                                                                                                                                                                                                                                                                                                                                                                                                                                                                                                                                                                                                                                                                                                                                                                                                                                                                                                                                                        |
| Low cost scenario         | <ol style="list-style-type: none"> <li>1. CCM Coverage: coverage reduced to 50% coverage of rural population in countries with CCM, remaining 50% were treated at health centre.</li> <li>2. One Community Health Worker per 5000 rural population</li> </ol>                                                                                                                                                                                                                                                                                                                                                                                                                                                                                                                                                                                                                                                                                                                                                                                                                                                                                                                                                                                                                        |
| Effective access scenario | <p>Based on data from published studies[39] (Guenther et al. 2012) reporting effective access to care (product of geographic access, staff availability and medicine availability)</p> <ol style="list-style-type: none"> <li>1. In countries without CCM in place, effective access rate for rural population is 9%, the remaining 91% of rural population will not have access to care</li> <li>2. In countries with CCM in place, effective access rate for rural population is 30% in a typical setting, the remaining 70% of rural population will not have access to care</li> </ol>                                                                                                                                                                                                                                                                                                                                                                                                                                                                                                                                                                                                                                                                                           |

|                                                                                                      |                                                                                                                                                                                                                                                                                                                                                                                                                                                                                      |
|------------------------------------------------------------------------------------------------------|--------------------------------------------------------------------------------------------------------------------------------------------------------------------------------------------------------------------------------------------------------------------------------------------------------------------------------------------------------------------------------------------------------------------------------------------------------------------------------------|
| <p>New<br/>(unpublished)<br/>data for<br/>proportion of<br/>pneumonia signs<br/>in HIV+ children</p> | <p>In high HIV prevalence setting (Malawi) the proportion of pneumonia cases with fast breathing only/ chest indrawing/ dangerous signs has been reported 85%, 1.5%, 13.5% (Tim Colbourn, personal communication). These are program data reported by health workers trained in iCCM. We applied this split to the estimated number of HIV-infected children with pneumonia reported in the literature. Split for HIV uninfected children remained as before- i.e. 85%, 13%, 2%.</p> |
| <p>High cost less<br/>effective scenario</p>                                                         | <ol style="list-style-type: none"> <li>1. CCM Coverage: 100% coverage of rural population in countries with CCM</li> <li>2. Unit cost of medicine changed based on review by Zhang et al 2016 [19]</li> <li>3. Mortality reduction with 2013 guideline: 36% (Theodoratou et al, 2010)[34], 2005 guideline remains 70%.</li> </ol>                                                                                                                                                    |
